# Supplementary material for: Association between district-level perceived safety and self-rated health: a multilevel study in Seoul, South Korea
Source: PubMed Central journal article supplement — BMJ Open. 2014 Jul 29;4(7):e004695. doi: 10.1136/bmjopen-2013-004695 (PMC4120300; doi:10.1136/bmjopen-2013-004695), 2014-07-29
Supplement: bmjopen-2013-004695.draft_revisions.pdf [file bmjopen-2013-004695.draft_revisions.pdf]

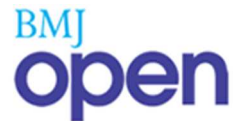

**Association between district-level safety and self-rated health: a multilevel study in an urban setting**

|                                 |                                                                                                                                                                                                                                                                                                                                                                                                                                                                                                                                   |
|---------------------------------|-----------------------------------------------------------------------------------------------------------------------------------------------------------------------------------------------------------------------------------------------------------------------------------------------------------------------------------------------------------------------------------------------------------------------------------------------------------------------------------------------------------------------------------|
| Journal:                        | <i>BMJ Open</i>                                                                                                                                                                                                                                                                                                                                                                                                                                                                                                                   |
| Manuscript ID:                  | bmjopen-2013-004695                                                                                                                                                                                                                                                                                                                                                                                                                                                                                                               |
| Article Type:                   | Research                                                                                                                                                                                                                                                                                                                                                                                                                                                                                                                          |
| Date Submitted by the Author:   | 16-Dec-2013                                                                                                                                                                                                                                                                                                                                                                                                                                                                                                                       |
| Complete List of Authors:       | Kim, Seung-Sup; Korea University, Department of Public Health Sciences<br>Choi, Jaesung; Sungkyunkwan University, Department of Economics<br>Park, Kisoo; Korea University, Department of Healthcare Management<br>Chung, Yeonseung; Korea Advanced Institute of Science and Technology,<br>Department of Mathematical Sciences<br>Park, Sangjo; Seoul National University, Department of Communication<br>Heo, Jongho; San Diego State University & University of California, San<br>Diego, Public Health Joint Doctoral Program |
| <b>Primary Subject Heading</b>: | Public health                                                                                                                                                                                                                                                                                                                                                                                                                                                                                                                     |
| Secondary Subject Heading:      | Epidemiology, Public health, Sociology                                                                                                                                                                                                                                                                                                                                                                                                                                                                                            |
| Keywords:                       | perceived neighborhood safety, self-rated health, neighborhood crime rate, Seoul Welfare Panel Study, multilevel analysis                                                                                                                                                                                                                                                                                                                                                                                                         |
|                                 |                                                                                                                                                                                                                                                                                                                                                                                                                                                                                                                                   |

SCHOLARONE™  
Manuscripts

1  
2  
3  
4 **Association between district-level safety and self-rated health:**  
5  
6  
7 **a multilevel study in an urban setting**  
8  
9

10  
11  
12 Seung-Sup Kim MD, ScD, Jaesung Choi PhD, Kisoo Park PhD, Yeonseung Chung PhD, Sangjo  
13 Park BA, Jongho Heo\*

14  
15  
16 Seung-Sup Kim

17 Department of Public Health Sciences, Korea University, Seoul, Republic of Korea, Department  
18 of Social and Behavioral Sciences, Harvard School of Public Health, Boston, US, Department of  
19 Environmental and Occupational Health, The George Washington University School of Public  
20 Health and Health Services, Washington, DC, US  
21

22  
23 Jaesung Choi

24 Department of Economics, Sungkyunkwan University, Seoul, Republic of Korea  
25

26  
27 Kisoo Park

28 Department of Healthcare Management, Korea University, Seoul, Republic of Korea  
29

30  
31 Yeonseung Chung

32 Department of Mathematical Sciences, Korea Advanced Institute of Science and Technology,  
33 Daejeon, Republic of Korea  
34

35  
36 Sangjo Park

37 Master's program, Department of Communication, Seoul National University, Seoul, Republic of  
38 Korea  
39

40  
41 Jongho Heo

42 Public Health Joint Doctoral Program, San Diego State University & University of California,  
43 San Diego, US  
44

45 Corresponding Author: Jongho Heo

46 Contact: +1-619-793-9738

47 Fax: +1-619-594-5888

48 E-mail: [joheo@ucsd.edu](mailto:joheo@ucsd.edu)

49  
50 Public Health Joint Doctoral Program, San Diego State University & University of California,  
51 San Diego, 9245 Sky Park Court, Ste. 100s, San Diego, CA, 92123, USA  
52  
53  
54  
55  
56  
57

1  
2  
3  
4  
5  
6  
7  
8  
9  
10  
11  
12  
13  
14  
15  
16  
17  
18  
19  
20  
21  
22  
23  
24  
25  
26  
27  
28  
29  
30  
31  
32  
33  
34  
35  
36  
37  
38  
39  
40  
41  
42  
43  
44  
45  
46  
47  
48  
49  
50  
51  
52  
53  
54  
55  
56  
57  
58  
59  
60

# Association between district-level safety and self-rated health: a multilevel study in an urban setting

## Abstract

**Objectives:** Several studies have reported the relationship between resident's perceived neighborhood safety and their health outcomes. However, those studies suffered from unreliability of neighborhood safety measure and potential residual confounding related to crime rates. In this study, using multilevel analysis to account for the hierarchical structure of the data, we examined associations between district-level safety and self-rated health after adjusting for potential confounders including individual-level perceived neighborhood safety and district-level crime rate.

**Design:** Cross-sectional study

**Setting:** We used the 1<sup>st</sup> wave of Seoul Welfare Panel Study, which has 7,761 individuals from 3,665 households in 25 administrative districts in Seoul, South Korea. District-level safety was obtained by aggregating responses from the residents that are representative samples for each administrative district in Seoul. We controlled objective district-level crime rate, individual-level perceived neighborhood safety and socio-demographic factors as well. To examine an association between district-level safety and residents' self-rated health, we used mixed effects logistic regression.

**Results:** Our results showed that higher district-level perceived safety, an aggregated measure of district residents' responses on neighborhood safety, was significantly associated with poor self-rated health after controlling for demographic influences and SES (OR: 0.87, 95% CI: 0.78-0.97). Notably, this association was still robust even when we additionally adjusted for district-level crime rate and individual-level perceived neighborhood safety (OR: 0.86, 95% CI: 0.77-0.96).

**Conclusions:** Our study highlights the importance of improving neighborhood safety to enhance resident health.

**Keywords:** perceived neighborhood safety, self-rated health, neighborhood crime rate, Seoul Welfare Panel Study, multilevel analysis

### **Strengths and limitations of this study**

- Multilevel analytic frame was used to examine an association between district-level safety and residents' self-rated health using representative samples of metropolis, Seoul, South Korea.
- We succeed in adjusting for potential confounders such as individual-level perceived neighborhood safety and district-level crime rate in our analytic model, which past studies have failed.
- Causal relationships cannot be inferred from the cross-sectional data.

## INTRODUCTION

Crime is one of the major problems in many metropolitan areas across countries. Although city crime rates have dropped globally since the mid-1990s,[1] there are still large variations and dramatic fluctuations across cities.[2] Past criminological studies revealed that variations in crime rates were explained by characteristics of metropolitan areas, such as population sizes, ethnic heterogeneity, geographic mobility, economic segregation, unemployment rate, poverty level and degree of social integration and control.[2-4] Thus, many governments have made great efforts to reduce the crime rates especially in metropolitan areas by intervening in those characteristics to ensure the safety of their residents.

Safety from crime is not only an essential human need in daily life, but also a prerequisite to human health.[5] A body of past studies has reported the relationship between residents' perceptions of neighborhood safety and their health outcomes.[6,7] For example, one UK survey with 407 adults reported that fear of crime was significantly associated with self-rated health and mental well-being.[8] Ziersch and Baum[10] showed that perceived neighborhood safety was related to physical and mental health among 2,400 residents in western suburbs of Adelaide, Australia.

However, these earlier studies suffer from the following limitations. First is the potential measurement error of the perceived neighborhood safety. The individual perception can be influenced by several factors such as prior individual experience of victimization, or individual health conditions other than neighborhood-level safety.[11,12] This could be particularly a critical issue in previous cross-sectional studies because of the potential reverse causation, meaning that the sick are more likely to perceive their neighborhood as unsafe.[7,13] The second

1  
2  
3  
4 limitation is lack of representativeness of samples within the operationalized definition of  
5  
6 neighborhood. The sample size or the sample size within neighborhood of previous studies was  
7  
8 too small to be representative for each neighborhood.[6, 8,14] Unless the responses are obtained  
9  
10 from a representative sample of participants within each neighborhood, aggregated perceived  
11  
12 neighborhood measures can potentially be prone to measurement errors. Also, unavailability in  
13  
14 appropriate neighborhood measure may explain why there is scant hierarchical or multilevel  
15  
16 analysis which allows for estimating the influence of neighborhood measures on residents' health  
17  
18 outcomes. The final limitation is that previous studies did not adjust for district-level crime rate  
19  
20 as a potential confounder although crime-rate has been reported to influence perception of  
21  
22 neighborhood safety as well as residents' health outcomes.  
23  
24  
25  
26  
27  
28

29 In this study, we assessed the district-level safety, which was obtained by aggregating responses  
30  
31 from the residents that are representative samples for each administrative district in Seoul, the  
32  
33 capital of South Korea. Then, using multilevel analysis to account for the hierarchical structure  
34  
35 of the data, we examined associations between district-level safety and self-rated health after  
36  
37 adjusting for potential confounders including individual-level perceived neighborhood safety and  
38  
39 district-level crime rate.  
40  
41  
42  
43  
44  
45

## 46 **METHODS**

### 47 **Study population**

48  
49  
50 Data were obtained from the Seoul Welfare Panel Study (SWPS), which tracked a representative  
51  
52 sample of households residing in 25 administrative districts in Seoul, South Korea. The SWPS  
53  
54 was launched in 2008 by the Seoul Welfare Foundation. The 1st wave of the survey was  
55  
56  
57  
58  
59  
60

1  
2  
3  
4 conducted in 2008 and its supplementary survey targeting the low-income households was  
5  
6 implemented in 2009. The SWPS was suspended after the 2nd wave of the survey was conducted  
7  
8 in 2010 September. The survey employed a two-stage stratified cluster sampling approach where  
9  
10 a representative sample of census tracts for each district was first drawn, and then households  
11  
12 were randomly selected within those sampled census tracts at baseline. A household  
13  
14 representative answered household survey and all members of a household whose age is 15 or  
15  
16 older were interviewed. A total of 7,761 individuals completed the interviews in Wave 1. The  
17  
18 SWPS have been publicly released [<http://panel.welfare.seoul.kr>]. Because there was no  
19  
20 observation with missing variables, the final sample used in the data analysis of this research  
21  
22 consists of 7,761 individuals from 3,665 households from 25 administrative districts in Seoul.  
23  
24  
25  
26  
27  
28 This research received IRB exemption from Division of Research Affairs at the San Diego State  
29  
30 University.  
31  
32

### 33 34 **Exposure: district-level perceived neighborhood safety**

35  
36  
37 Perceived neighborhood safety was assessed through the household survey using a question  
38  
39 about how much a household representative agrees with the following statement: ‘My current  
40  
41 residential environment is unsafe’. Respondents answered in a five ordinal scale from “very  
42  
43 agree” (coded as 1) to “very disagree” (coded as 5). The answer was then dichotomized into  
44  
45 “unsafe” (coded as 0) for the response, 1-3 and “safe” (coded as 1) for the response, 4-5. The  
46  
47 binary responses from household representatives were aggregated to calculate an administrative  
48  
49 district-level perceived neighborhood safety by taking a weighted average within each district  
50  
51 with the household size used as weight. Such aggregation implies that the district-level perceived  
52  
53  
54  
55  
56  
57  
58  
59  
60

1  
2  
3  
4 neighborhood safety is essentially a sample proportion of individuals who answered “safe”  
5  
6 within each district.  
7  
8

### 9 10 **Outcome: self-rated health**

11  
12  
13 Poor self-rated health was assessed through the individual interview using the question “How  
14 would you rate your overall health?” Respondents answered within a five ordinal scale ranging  
15 from “Very good” (coded as 1) to “very poor” (coded as 5). The response was then dichotomized  
16 into “good health” (coded as 0) for response, 1-3 and “poor health” (coded as 1) for response, 4-  
17 5. Although self-rated health cannot assess multi-dimensional aspects of health conditions, it is  
18 known to be a reliable predictor of life-expectancy after adjusting for other health indicators.[15]  
19  
20  
21  
22  
23  
24  
25  
26  
27

### 28 **Covariates**

29  
30  
31 We included several confounders in the data analysis. For individual-level confounders, we have  
32 sex, age group (15-19 yrs, 20-29 yrs, 30-39 yrs, 40-49 yrs, 50-59 yrs, 60-69 yrs, and 70 years or  
33 more), education level (elementary or less, junior high school, high school, college graduate,  
34 university graduate, and graduate school or more), marital status(married or cohabiting vs.  
35 others), and job status (employed vs. unemployed), household with six categories (1,000,000  
36 KRW or less, 1,010,000-2,000,000 KRW, 2,010,000-3,000,000 KRW, 3,010,000-4,000,000  
37 KRW, 4,010,000-5,000,000 KRW, and Above 5,000,000 KRW), and individual-level  
38 neighborhood safety (unsafe vs. safe). Because neighborhood safety was assessed solely from the  
39 household survey, we assigned the value of perceived neighborhood safety measured from each  
40 household representative to all members of the household.  
41  
42  
43  
44  
45  
46  
47  
48  
49  
50  
51  
52  
53  
54  
55  
56  
57  
58  
59  
60



1  
2  
3  
4 We considered district-level crime rate as a potential covariate at district-level because it can  
5 influence residents' health as well as perceived safety. District-level crime rates for each of 25  
6 administrative district ('Gu') in Seoul were collected from the 'Analytical report on crimes  
7 (2008)' that is annually published by supreme prosecutors' office in South Korea.[16] Crime rate  
8 was calculated by dividing the total number of crimes by the total number of residents in each  
9 district (Expressed in number/year/1000persons). Using an administrative district identifier in the  
10 SWPS, we linked the official crime rate of each administrative district to our final dataset of the  
11 SWPS.  
12  
13  
14  
15  
16  
17  
18  
19  
20  
21  
22

### 23 24 **Data analysis**

25  
26 Mixed effects logistic regression was used to investigate the association between district-level  
27 safety and self-rated health. Because of the hierarchical structure in our data (i.e., individuals are  
28 nested in households, which in turn are nested in districts), within-household and within-district  
29 correlations were incorporated using household-specific and district-specific random intercepts.  
30 We made stepwise adjustments of potential confounders in the data analysis. First, we adjusted  
31 for potential confounders including sex, age, education level, job status, marital status, and  
32 household-level income. Second, we added individual-level perceived neighborhood safety to the  
33 previously listed confounders for adjustment. Finally, we examined the association after  
34 adjusting for district-level crime rate in addition to all of the previously mentioned confounders.  
35 All of the confounders were included as categorical variables and the district-level safety was  
36 included after standardization for simple interpretation in the model. All computations were done  
37 using R statistical software.  
38  
39  
40  
41  
42  
43  
44  
45  
46  
47  
48  
49  
50  
51  
52  
53  
54  
55  
56  
57  
58  
59  
60

## RESULTS

Table 1 presents the distribution of the study population and the prevalence of poor self-rated health by each of the individual-level, household-level, and district-level characteristics. Overall, self-rated health was reported at 20.9% (1,620 out of 7,761 participants). The proportion was higher for women and showed an increasing pattern with age. Lower proportions were observed for participants in lower education levels. The unemployed and the group of people in an unsafe neighborhood exhibited higher prevalence of poor self-rated health compared to the employed and the group in a safe neighborhood. Household income were fairly equally distributed in the SWPS. As to the district-level safety and crime rate, given the overall mean of each variable, relative size of each standard deviation shows that there are considerable variations among the 25 districts.

District-level safety was significantly associated with poor self-rated health while different sets of confounders being step-wisely adjusted (Table 2). Living in a district where its safety level is 1 standard deviation (0.08) higher resulted in 13% lower odds of reporting self-rated poor health status (OR: 0.87, 95% CI: 0.78, 0.97) after adjusting for sex, age, education level, job status, marital status, and household-level income. When adjusted for individual-level safety, this association was slightly attenuated but still significant (OR: 0.88, 95% CI: 0.79, 0.98). When we controlled for district-level crime, the magnitude of this association was slightly increased and remained significant (OR: 0.86, 95% CI: 0.77, 0.96).

## DISCUSSION

1  
2  
3  
4 Evidence from our study indicated that district-level safety, as assessed by aggregating responses  
5 from district residents, was significantly associated with poor self-rated health even after  
6  
7 controlling for demographic influences and SES. Notably, this association was still robust when  
8  
9 we also adjusted for district-level crime rate and individual-level perceived neighborhood safety.  
10  
11  
12

13  
14 Our findings are in line with previous research that showed associations between perceived  
15 regional safety and health outcomes. Past studies have also reported that residents who perceived  
16 that their neighborhood had more severe problems were more likely to experience greater  
17 anxiety, stress, and depression.[6,17] The studies sampled women, children, and the elderly also  
18 provided consistent evidence of a relationship between perceived crime risk and physical  
19 health.[7,14]  
20  
21  
22  
23  
24  
25  
26  
27  
28  
29

30 In this study, district-level crime rate was not associated with self-rated health in the fully  
31 adjusted model. Furthermore, our post-hoc analysis showed that there was no statistically  
32 significant relationship between district crime rate and residents' self-rated health regardless of  
33 covariate adjustment, although district-level crime rate could be a major influence on district-  
34 level safety. This finding is different from past studies that reported a significant relationship  
35 between district crime rate and residents' health such as coronary heart disease[18] and low birth  
36 weight.[19]  
37  
38  
39  
40  
41  
42  
43  
44  
45  
46

47 The differential association between perceived district-level perceived safety and crime rate in  
48 relation to self-rated health could be explained by three ways. First, mass media may increase  
49 individual-level perceived neighborhood insecurity regardless of their neighborhood crime rates,  
50 especially when they reported the crime in ways of exaggeration.[20,21] The mass media tend to  
51  
52  
53  
54  
55  
56  
57  
58  
59  
60

1  
2  
3  
4 emphasize criminal stories which can draw attention from audience.[22] Previous studies called  
5  
6 this phenomenon as "cultivation effect" meaning that exposure to the world of television  
7  
8 cultivates exaggerated perceptions of viewers and magnifies viewers' fear about crime.[23] The  
9  
10 residents who watched news on neighborhood crimes may perceive their neighborhood more  
11  
12 vulnerable regions to crime. Moreover, mass media may also increase the perceived  
13  
14 neighborhood safety of individuals regardless of their objective neighborhood crime rates.[21]  
15  
16 Second, different types of crime have different effects on the perceived risk or fear of crime. For  
17  
18 example, murder, rape, and personal theft may have higher effects on the fear of crime than  
19  
20 larceny and auto-theft. Hence, total crime rate that was used in this research to indicate district-  
21  
22 level crime rate would not be a proper measure when searching its association with the residents'  
23  
24 health condition.[24] Finally, if social and physical resources of neighborhood are deteriorated or  
25  
26 deprived, residents tend to perceive neighborhood safety more irrespective with the objective  
27  
28 neighborhood crime rate.[25] The poor quality of social and physical environment, such as  
29  
30 dilapidated houses or having no formal or informal neighborhood networks, may trigger to  
31  
32 perceive neighborhood dangerous.[26,27]

33  
34  
35  
36  
37  
38  
39  
40 There could be several pathways linking these perceived neighborhood safety to self-rated health  
41  
42 irrespective to objective neighborhood crime rate. First, higher district-level perceived safety can  
43  
44 cause less outdoor physical activities[7,28] leading to poor health. Second, elevated district-level  
45  
46 perceived safety iteratively aggravate social supports or deteriorate physical environments, in  
47  
48 turn, may harm mental and physical outcomes.[29] Last, elevated district-level perceived safety  
49  
50 may be a latent stressor causing chronic stress status undermine residents' mental health.[30]  
51  
52  
53  
54  
55  
56  
57  
58  
59  
60

1  
2  
3  
4 Our study has a limitation of potential reverse causation due to its cross-sectional study design,  
5  
6 implying that people with poor-self rated health are more likely to perceive their neighborhood  
7  
8 as unsafe. However, because the association was still significant after adjusting for individual-  
9  
10 perceived safety, which is a critical pathway of this reverse causation, so we believe that the  
11  
12 potential reverse causation cannot fully explain the observed association.  
13  
14

15  
16  
17 Despite this limitation, our study has the strength in that we used representative samples for each  
18  
19 operationalized administrative district, which enabled multi-level analysis using an aggregate  
20  
21 measure of perceived safety as an exposure variable. Furthermore, we found a significant  
22  
23 association after adjusting for other relevant potential confounder such as district-crime rate that  
24  
25 could influence both exposure and outcome variable in this study. To our knowledge, this is one  
26  
27 of the first studies controlled for crime-rate to examine the association between perceived  
28  
29 neighborhood safety and health outcome.  
30  
31  
32

33  
34 In sum, our study showed that district-level perceived safety was associated with residents' poor  
35  
36 self-rated health even after controlling for demographic influences, SES, district-level crime rate,  
37  
38 and individual-level perceived safety. Our study results evoke the importance of local authorities  
39  
40 (or governments) to make efforts toward improving neighborhood safety to enhance resident  
41  
42 health.  
43  
44  
45  
46  
47  
48  
49  
50  
51  
52  
53  
54  
55  
56  
57  
58  
59  
60

Table 1. Descriptive statistics for the independent variables and their associations with self-rated poor health (N=7761)

| Variables                                                      | Total       | Prevalence of poor self-rated health |              |
|----------------------------------------------------------------|-------------|--------------------------------------|--------------|
|                                                                | N           | N (%)                                | p-values     |
| <i>Individual level variables (N=7761)</i>                     |             |                                      |              |
| <b>Sex</b>                                                     |             |                                      | <0.0001      |
| Male                                                           | 3547        | 599 (16.9)                           |              |
| Female                                                         | 4214        | 1021 (24.2)                          |              |
| <b>Age (years)</b>                                             |             |                                      | <0.0001      |
| 15-19                                                          | 536         | 17 (3.2)                             |              |
| 20-29                                                          | 973         | 26 (2.7)                             |              |
| 30-39                                                          | 1577        | 92 (5.8)                             |              |
| 40-49                                                          | 1425        | 185 (13.0)                           |              |
| 50-59                                                          | 1139        | 242 (21.2)                           |              |
| 60-69                                                          | 1130        | 482 (42.7)                           |              |
| 70 or more                                                     | 981         | 576 (58.7)                           |              |
| <b>Job Status</b>                                              |             |                                      | <0.0001      |
| Employed                                                       | 3199        | 293 (9.2)                            |              |
| Unemployed                                                     | 4562        | 1327 (29.1)                          |              |
| <b>Education Level</b>                                         |             |                                      | <0.0001      |
| Elementary school or less                                      | 1143        | 664 (58.1)                           |              |
| Middle school                                                  | 703         | 271 (38.5)                           |              |
| High school                                                    | 2483        | 433 (17.4)                           |              |
| College graduate                                               | 572         | 46 (8.0)                             |              |
| University graduate                                            | 2516        | 185 (7.4)                            |              |
| Graduate school or more                                        | 344         | 21 (6.1)                             |              |
| <b>Marital status</b>                                          |             |                                      | 0.151        |
| Married/cohabiting                                             | 5059        | 1031 (20.4)                          |              |
| Others                                                         | 2702        | 589 (21.8)                           |              |
| <b>Individual-level safety</b>                                 |             |                                      | <0.0001      |
| Safe                                                           | 6777        | 1361 (20.1)                          |              |
| Unsafe                                                         | 984         | 259 (26.3)                           |              |
| <i>Household level variables (N=3665)</i>                      |             |                                      |              |
| <b>Household Income</b>                                        |             |                                      |              |
| 1,000,000 KRW or less                                          | 770         |                                      |              |
| 1,010,000-2,000,000 KRW                                        | 772         |                                      |              |
| 2,010,000-3,000,000 KRW                                        | 656         |                                      |              |
| 3,010,000-4,000,000 KRW                                        | 510         |                                      |              |
| 4,010,000-5,000,000 KRW                                        | 345         |                                      |              |
| Above 5,000,000 KRW                                            | 612         |                                      |              |
| <i>District level variables (N=25)</i>                         |             |                                      |              |
| <b>District-level perceived safety</b> (mean (SD) <sup>a</sup> | <u>Mean</u> | <u>S.D.</u>                          | <u>Range</u> |
|                                                                | 0.87        | 0.08                                 | 0.68-0.98    |

1  
2  
3  
4 **District-level crime rate (mean (SD))<sup>b</sup>** 4.63 2.94 2.25-16.31  
5

---

6 <sup>a</sup> District-specific average of individual-level safety  
7

8 <sup>b</sup> Expressed in number/year/1000persons  
9  
10  
11  
12  
13  
14  
15  
16  
17  
18  
19  
20  
21  
22  
23  
24  
25  
26  
27  
28  
29  
30  
31  
32  
33  
34  
35  
36  
37  
38  
39  
40  
41  
42  
43  
44  
45  
46  
47  
48  
49  
50  
51  
52  
53  
54  
55  
56  
57  
58  
59  
60

For peer review only

1  
2  
3  
4  
5  
6  
7  
8  
9  
10  
11  
12  
13  
14  
15  
16  
17  
18  
19  
20  
21  
22  
23  
24  
25  
26  
27  
28  
29  
30  
31  
32  
33  
34  
35  
36  
37  
38  
39  
40  
41  
42  
43  
44  
45  
46  
47  
48  
49

Table 2. Associations between district-level perceived safety and poor self-rated health

|                                              | Unadjusted |              | Adjusted <sup>a</sup> |              |       |              |        |              |
|----------------------------------------------|------------|--------------|-----------------------|--------------|-------|--------------|--------|--------------|
|                                              | OR         | 95% CI       | OR                    | 95% CI       | OR    | 95% CI       | OR     | 95% CI       |
| District-level perceived safety <sup>b</sup> | 0.83***    | (0.76, 0.91) | 0.87*                 | (0.78, 0.97) | 0.88* | (0.79, 0.98) | 0.86** | (0.77, 0.96) |
| Individual-level perceived safety            |            |              |                       |              | 0.83  | (0.66, 1.04) | 0.82   | (0.65, 1.04) |
| District-level crime rate                    |            |              |                       |              |       |              | 0.97   | (0.93, 1.01) |

<sup>a</sup> Adjusted for sex, age, education level, job status, marital status, and household-level income

<sup>b</sup> Aggregated responses about neighborhood safety among residents in the same district. The variables was included in the data analysis after standardization

\* p-value<0.05, \*\* p-value<0.01, \*\*\* p-value<0.001



1  
2  
3 Acknowledgments: None  
4

5 Contributorship: SSK coordinated the design, analysis and writing the manuscript. JC, KP, YC,  
6 SP, JH participated in the design, analysis and in preparing the manuscript. All of the authors  
7 contributed to read, edited and approved of the final draft of the manuscript.  
8  
9

10 Competing interests: None  
11

12 Data Sharing Statement: No additional data are available.  
13

14  
15  
16  
17 This research received no specific grant from any funding agency in the public, commercial or  
18 not-for-profit sectors.  
19  
20  
21  
22  
23  
24  
25  
26  
27  
28  
29  
30  
31  
32  
33  
34  
35  
36  
37  
38  
39  
40  
41  
42  
43  
44  
45  
46  
47  
48  
49  
50  
51  
52  
53  
54  
55  
56  
57  
58  
59  
60

## REFERENCES

1. Tseloni A, Mailley J, Farrell G, et al. Exploring the international decline in crime rates. *European Journal of Criminology* 2010;**7**(5):375-94.
2. McCall PL, Land KC, Parker KF. Heterogeneity in the rise and decline of city-level homicide rates, 1976–2005: A latent trajectory analysis. *Social Science Research* 2011;**40**(1):363-78.
3. Sampson RJ, Raudenbush SW, Earls F. Neighborhoods and violent crime: A multilevel study of collective efficacy. *Science* 1997;**277**(5328):918-24.
4. Patterson EB. Poverty, income inequality, and community crime rates. *Criminology* 1991;**29**(4):755-76.
5. Krug EG, Mercy JA, Dahlberg LL, et al. The world report on violence and health. *The lancet* 2002;**360**(9339):1083-88.
6. Gary TL, Stark SA, LaVeist TA. Neighborhood characteristics and mental health among African Americans and whites living in a racially integrated urban community. *Health & Place* 2007;**13**(2):569-75.
7. Tucker-Seeley RD, Subramanian S, Li Y, et al. Neighborhood safety, socioeconomic status, and physical activity in older adults. *American journal of preventive medicine* 2009;**37**(3):207-13.
8. Green G, Gilbertson JM, Grimsley MF. Fear of crime and health in residential tower blocks A case study in Liverpool, UK. *The European Journal of Public Health* 2002;**12**(1):10-15.
9. Latkin CA, Curry AD. Stressful neighborhoods and depression: a prospective study of the impact of neighborhood disorder. *Journal of health and social behavior* 2003:34-44.
10. Ziersch AM, Baum FE, MacDougall C, et al. Neighbourhood life and social capital: the implications for health. *Social science & medicine* 2005;**60**(1):71-86.

- 1  
2  
3 11. Raudenbush SW. *Hierarchical linear models: Applications and data analysis methods*:  
4  
5 Sage, 2002.  
6
- 7  
8 12. Kruger DJ, Reischl TM, Gee GC. Neighborhood social conditions mediate the association  
9  
10 between physical deterioration and mental health. *American journal of community*  
11  
12 *psychology* 2007;**40**(3-4):261-71.  
13
- 14 13. Wen M, Hawkey LC, Cacioppo JT. Objective and perceived neighborhood environment,  
15  
16 individual SES and psychosocial factors, and self-rated health: An analysis of older  
17  
18 adults in Cook County, Illinois. *Social science & medicine* 2006;**63**(10):2575-90.  
19
- 20 14. White M, Kasl SV, Zahner GE, et al. Perceived crime in the neighborhood and mental health  
21  
22 of women and children. *Environment and Behavior* 1987;**19**(5):588-613.  
23
- 24 15. Idler EL, Benyamini Y. Self-rated health and mortality: a review of twenty-seven community  
25  
26 studies. *J Health Soc Behav* 1997;**38**(1):21-37.  
27
- 28 16. Supreme Prosecutors' Office Republic Of Korea. Analytical Report on Crimes (2008), 2009.  
29
- 30 17. Curry A, Latkin C, Davey-Rothwell M. Pathways to depression: The impact of neighborhood  
31  
32 violent crime on inner-city residents in Baltimore, Maryland, USA. *Social Science &*  
33  
34 *Medicine* 2008;**67**(1):23-30.  
35
- 36 18. Sundquist K, Theobald H, Yang M, et al. Neighborhood violent crime and unemployment  
37  
38 increase the risk of coronary heart disease: a multilevel study in an urban setting. *Social*  
39  
40 *science & medicine* 2006;**62**(8):2061-71.  
41  
42
- 43 19. O'Campo P, Xue X, Wang M-C, et al. Neighborhood risk factors for low birthweight in  
44  
45 Baltimore: a multilevel analysis. *American Journal of Public Health* 1997;**87**(7):1113-18.  
46
- 47 20. Warr M. Fear of victimization. *Public Perspective* 1993;**5**:25-28.  
48
- 49 21. Romer D, Jamieson KH, Aday S. Television news and the cultivation of fear of crime.  
50  
51 *Journal of communication* 2003;**53**(1):88-104.  
52
- 53 22. Lipschultz JH, Hilt ML. *Crime and local television news: Dramatic, breaking, and live from*  
54  
55 *the scene*: Routledge, 2002.  
56  
57  
58  
59  
60

- 1  
2  
3 23. Gerbner G. Cultivation analysis: An overview. *Mass Communication and Society* 1998;**1**(3-  
4 4):175-94.  
5  
6  
7 24. Meier RF, Short JF. CRIME AS HAZARD: PERCEPTIONS OF RISK AND SERIOUSNESS\*.  
8 *Criminology* 1985;**23**(3):389-400.  
9  
10 25. Carpiano RM. Toward a neighborhood resource-based theory of social capital for health:  
11 Can Bourdieu and sociology help? *Social science & medicine* 2006;**62**(1):165-75.  
12  
13 26. Rodrigues CD. Civil democracy, perceived risk, and insecurity in Brazil: An extension of the  
14 systemic social control model. *The Annals of the American Academy of Political and*  
15 *Social Science* 2006;**605**(1):242-63.  
16  
17 27. Gibson CL, Zhao J, Lovrich NP, et al. Social integration, individual perceptions of collective  
18 efficacy, and fear of crime in three cities. *Justice Quarterly* 2002;**19**(3):537-64.  
19  
20 28. Roman CG, Chalfin A. Fear of walking outdoors: a multilevel ecologic analysis of crime and  
21 disorder. *American journal of preventive medicine* 2008;**34**(4):306-12.  
22  
23 29. Kim S-S, Chung Y, Perry MJ, et al. Association between interpersonal trust, reciprocity, and  
24 depression in South Korea: A prospective analysis. *PloS one* 2012;**7**(1):e30602.  
25  
26 30. Stockdale SE, Wells KB, Tang L, et al. The importance of social context: neighborhood  
27 stressors, stress-buffering mechanisms, and alcohol, drug, and mental health disorders.  
28 *Social Science & Medicine* 2007;**65**(9):1867-81.  
29  
30  
31  
32  
33  
34  
35  
36  
37  
38  
39  
40  
41  
42  
43  
44  
45  
46  
47  
48  
49  
50  
51  
52  
53  
54  
55  
56  
57  
58  
59  
60

**STROBE 2007 (v4) checklist of items to be included in reports of observational studies in epidemiology\***  
**Checklist for cohort, case-control, and cross-sectional studies (combined)**

| Section/Topic             | Item # | Recommendation                                                                                                                                                                                                                                                                                                                                                                                                                                                         | Reported on page # |
|---------------------------|--------|------------------------------------------------------------------------------------------------------------------------------------------------------------------------------------------------------------------------------------------------------------------------------------------------------------------------------------------------------------------------------------------------------------------------------------------------------------------------|--------------------|
| Title and abstract        | 1      | (a) Indicate the study's design with a commonly used term in the title or the abstract                                                                                                                                                                                                                                                                                                                                                                                 | 3                  |
|                           |        | (b) Provide in the abstract an informative and balanced summary of what was done and what was found                                                                                                                                                                                                                                                                                                                                                                    | 3                  |
| <b>Introduction</b>       |        |                                                                                                                                                                                                                                                                                                                                                                                                                                                                        |                    |
| Background/rationale      | 2      | Explain the scientific background and rationale for the investigation being reported                                                                                                                                                                                                                                                                                                                                                                                   | 5-6                |
| Objectives                | 3      | State specific objectives, including any pre-specified hypotheses                                                                                                                                                                                                                                                                                                                                                                                                      | 6                  |
| <b>Methods</b>            |        |                                                                                                                                                                                                                                                                                                                                                                                                                                                                        |                    |
| Study design              | 4      | Present key elements of study design early in the paper                                                                                                                                                                                                                                                                                                                                                                                                                | 6-7                |
| Setting                   | 5      | Describe the setting, locations, and relevant dates, including periods of recruitment, exposure, follow-up, and data collection                                                                                                                                                                                                                                                                                                                                        | 6-7                |
| Participants              | 6      | (a) <i>Cohort study</i> —Give the eligibility criteria, and the sources and methods of selection of participants. Describe methods of follow-up<br><i>Case-control study</i> —Give the eligibility criteria, and the sources and methods of case ascertainment and control selection. Give the rationale for the choice of cases and controls<br><i>Cross-sectional study</i> —Give the eligibility criteria, and the sources and methods of selection of participants | 6-7                |
|                           |        | (b) <i>Cohort study</i> —For matched studies, give matching criteria and number of exposed and unexposed<br><i>Case-control study</i> —For matched studies, give matching criteria and the number of controls per case                                                                                                                                                                                                                                                 | 6-7                |
| Variables                 | 7      | Clearly define all outcomes, exposures, predictors, potential confounders, and effect modifiers. Give diagnostic criteria, if applicable                                                                                                                                                                                                                                                                                                                               | 7-9                |
| Data sources/ measurement | 8*     | For each variable of interest, give sources of data and details of methods of assessment (measurement). Describe comparability of assessment methods if there is more than one group                                                                                                                                                                                                                                                                                   |                    |
| Bias                      | 9      | Describe any efforts to address potential sources of bias                                                                                                                                                                                                                                                                                                                                                                                                              | 7-9                |
| Study size                | 10     | Explain how the study size was arrived at                                                                                                                                                                                                                                                                                                                                                                                                                              | 7                  |
| Quantitative variables    | 11     | Explain how quantitative variables were handled in the analyses. If applicable, describe which groupings were chosen and why                                                                                                                                                                                                                                                                                                                                           | 7-9                |
| Statistical methods       | 12     | (a) Describe all statistical methods, including those used to control for confounding                                                                                                                                                                                                                                                                                                                                                                                  | 9                  |
|                           |        | (b) Describe any methods used to examine subgroups and interactions                                                                                                                                                                                                                                                                                                                                                                                                    | 9                  |
|                           |        | (c) Explain how missing data were addressed                                                                                                                                                                                                                                                                                                                                                                                                                            | 9                  |
|                           |        | (d) <i>Cohort study</i> —If applicable, explain how loss to follow-up was addressed<br><i>Case-control study</i> —If applicable, explain how matching of cases and controls was addressed                                                                                                                                                                                                                                                                              | 9                  |

|                          |     |                                                                                                                                                                                                              |    |
|--------------------------|-----|--------------------------------------------------------------------------------------------------------------------------------------------------------------------------------------------------------------|----|
|                          |     | <i>Cross-sectional study</i> —If applicable, describe analytical methods taking account of sampling strategy                                                                                                 |    |
|                          |     | (e) Describe any sensitivity analyses                                                                                                                                                                        |    |
| <b>Results</b>           |     |                                                                                                                                                                                                              |    |
| Participants             | 13* | (a) Report numbers of individuals at each stage of study—eg numbers potentially eligible, examined for eligibility, confirmed eligible, included in the study, completing follow-up, and analysed            | 10 |
|                          |     | (b) Give reasons for non-participation at each stage                                                                                                                                                         |    |
|                          |     | (c) Consider use of a flow diagram                                                                                                                                                                           |    |
| Descriptive data         | 14* | (a) Give characteristics of study participants (eg demographic, clinical, social) and information on exposures and potential confounders                                                                     | 10 |
|                          |     | (b) Indicate number of participants with missing data for each variable of interest                                                                                                                          |    |
|                          |     | (c) <i>Cohort study</i> —Summarise follow-up time (eg, average and total amount)                                                                                                                             |    |
| Outcome data             | 15* | <i>Cohort study</i> —Report numbers of outcome events or summary measures over time                                                                                                                          |    |
|                          |     | <i>Case-control study</i> —Report numbers in each exposure category, or summary measures of exposure                                                                                                         |    |
|                          |     | <i>Cross-sectional study</i> —Report numbers of outcome events or summary measures                                                                                                                           | 10 |
| Main results             | 16  | (a) Give unadjusted estimates and, if applicable, confounder-adjusted estimates and their precision (eg, 95% confidence interval). Make clear which confounders were adjusted for and why they were included | 10 |
|                          |     | (b) Report category boundaries when continuous variables were categorized                                                                                                                                    | 10 |
|                          |     | (c) If relevant, consider translating estimates of relative risk into absolute risk for a meaningful time period                                                                                             |    |
| Other analyses           | 17  | Report other analyses done—eg analyses of subgroups and interactions, and sensitivity analyses                                                                                                               |    |
| <b>Discussion</b>        |     |                                                                                                                                                                                                              |    |
| Key results              | 18  | Summarise key results with reference to study objectives                                                                                                                                                     | 11 |
| Limitations              | 19  | Discuss limitations of the study, taking into account sources of potential bias or imprecision. Discuss both direction and magnitude of any potential bias                                                   | 13 |
| Interpretation           | 20  | Give a cautious overall interpretation of results considering objectives, limitations, multiplicity of analyses, results from similar studies, and other relevant evidence                                   | 13 |
| Generalisability         | 21  | Discuss the generalisability (external validity) of the study results                                                                                                                                        |    |
| <b>Other information</b> |     |                                                                                                                                                                                                              |    |
| Funding                  | 22  | Give the source of funding and the role of the funders for the present study and, if applicable, for the original study on which the present article is based                                                | 17 |

\*Give information separately for cases and controls in case-control studies and, if applicable, for exposed and unexposed groups in cohort and cross-sectional studies.

**Note:** An Explanation and Elaboration article discusses each checklist item and gives methodological background and published examples of transparent reporting. The STROBE checklist is best used in conjunction with this article (freely available on the Web sites of PLoS Medicine at <http://www.plosmedicine.org/>, Annals of Internal Medicine at <http://www.annals.org/>, and Epidemiology at <http://www.epidem.com/>). Information on the STROBE Initiative is available at [www.strobe-statement.org](http://www.strobe-statement.org).

# BMJ Open

## Association between district-level safety and self-rated health: a multilevel study in an urban setting

|                                 |                                                                                                                                                                                                                                                                                                                                                                                                                                                                                                                                   |
|---------------------------------|-----------------------------------------------------------------------------------------------------------------------------------------------------------------------------------------------------------------------------------------------------------------------------------------------------------------------------------------------------------------------------------------------------------------------------------------------------------------------------------------------------------------------------------|
| Journal:                        | <i>BMJ Open</i>                                                                                                                                                                                                                                                                                                                                                                                                                                                                                                                   |
| Manuscript ID:                  | bmjopen-2013-004695.R1                                                                                                                                                                                                                                                                                                                                                                                                                                                                                                            |
| Article Type:                   | Research                                                                                                                                                                                                                                                                                                                                                                                                                                                                                                                          |
| Date Submitted by the Author:   | 21-Apr-2014                                                                                                                                                                                                                                                                                                                                                                                                                                                                                                                       |
| Complete List of Authors:       | Kim, Seung-Sup; Korea University, Department of Public Health Sciences<br>Choi, Jaesung; Sungkyunkwan University, Department of Economics<br>Park, Kisoo; Korea University, Department of Healthcare Management<br>Chung, Yeonseung; Korea Advanced Institute of Science and Technology,<br>Department of Mathematical Sciences<br>Park, Sangjo; Seoul National University, Department of Communication<br>Heo, Jongho; San Diego State University & University of California, San<br>Diego, Public Health Joint Doctoral Program |
| <b>Primary Subject Heading</b>: | Public health                                                                                                                                                                                                                                                                                                                                                                                                                                                                                                                     |
| Secondary Subject Heading:      | Epidemiology, Public health, Sociology                                                                                                                                                                                                                                                                                                                                                                                                                                                                                            |
| Keywords:                       | perceived neighborhood safety, self-rated health, neighborhood crime rate, Seoul Welfare Panel Study, multilevel analysis                                                                                                                                                                                                                                                                                                                                                                                                         |
|                                 |                                                                                                                                                                                                                                                                                                                                                                                                                                                                                                                                   |

SCHOLARONE™  
Manuscripts

1  
2  
3  
4  
5  
6  
7 **Association between district-level safety and self-rated health:**  
8  
9  
10 **a multilevel study in an urban setting**  
11  
12  
13

14 Seung-Sup Kim MD, ScD, Jaesung Choi PhD, Kisoo Park PhD, Yeonseung Chung PhD, Sangjo  
15 Park BA, Jongho Heo\*  
16

17  
18 Seung-Sup Kim

19 Department of Public Health Sciences, Korea University, Seoul, Republic of Korea, Department  
20 of Social and Behavioral Sciences, Harvard School of Public Health, Boston, US, Department of  
21 Environmental and Occupational Health, The George Washington University School of Public  
22 Health and Health Services, Washington, DC, US  
23  
24

25  
26 Jaesung Choi

27 Department of Economics, Sungkyunkwan University, Seoul, Republic of Korea  
28

29  
30 Kisoo Park

31 Department of Healthcare Management, Korea University, Seoul, Republic of Korea  
32

33  
34 Yeonseung Chung

35 Department of Mathematical Sciences, Korea Advanced Institute of Science and Technology,  
36 Daejeon, Republic of Korea  
37

38  
39 Sangjo Park

40 Master's program, Department of Communication, Seoul National University, Seoul, Republic of  
41 Korea  
42

43  
44 Jongho Heo

45 Public Health Joint Doctoral Program, San Diego State University & University of California,  
46 San Diego, US  
47

48 Corresponding Author: Jongho Heo

49 Contact: +1-619-793-9738

50 Fax: +1-619-594-5888

51 E-mail: [joheo@ucsd.edu](mailto:joheo@ucsd.edu)

52 Public Health Joint Doctoral Program, San Diego State University & University of California,  
53 San Diego, 9245 Sky Park Court, Ste. 100s, San Diego, CA, 92123, USA  
54  
55  
56  
57



1  
2  
3  
4  
5  
6  
7 Association between district-level safety and self-rated health:  
8  
9 a multilevel study in an urban setting  
10  
11  
12  
13

14 **Abstract**  
15

16  
17 **Objectives:** Several studies have reported the relationship between resident's perceived  
18 neighborhood safety and their health outcomes. However, those studies suffered from  
19 unreliability of neighborhood safety measure and potential residual confounding related to crime  
20 rates. In this study, using multilevel analysis to account for the hierarchical structure of the data,  
21 we examined associations between district-level safety and self-rated health after adjusting for  
22 potential confounders including individual-level perceived neighborhood safety and district-level  
23 crime rate.  
24  
25

26  
27 **Design:** Cross-sectional study  
28

29  
30 **Setting:** We used the 1<sup>st</sup> wave of Seoul Welfare Panel Study, which has 7,761 individuals from  
31 3,665 households in 25 administrative districts in Seoul, South Korea. District-level safety was  
32 obtained by aggregating responses from the residents that are representative samples for each  
33 administrative district in Seoul. To examine an association between district-level safety and  
34 residents' self-rated health, we used mixed effects logistic regression.  
35  
36

37  
38 **Results:** Our results showed that higher district-level perceived safety, an aggregated measure of  
39 district residents' responses on neighborhood safety, was significantly associated with poor self-  
40 rated health after controlling for demographic influences and SES (OR: 0.87, 95% CI: 0.78-0.97).  
41 Notably, this association was still robust even when we additionally adjusted for district-level  
42 crime rate and individual-level perceived neighborhood safety (OR: 0.86, 95% CI: 0.77-0.96).  
43  
44

45  
46 **Conclusions:** Our study highlights the importance of improving neighborhood safety to enhance  
47 resident health.  
48  
49  
50  
51

52  
53 **Keywords:** perceived neighborhood safety, self-rated health, neighborhood crime rate, Seoul  
54 Welfare Panel Study, multilevel analysis  
55  
56  
57

### **Strengths and limitations of this study**

- Multilevel analytic frame was used to examine an association between district-level safety and residents' self-rated health using representative samples of metropolis, Seoul, South Korea.
- We succeed in adjusting for potential confounders such as individual-level perceived neighborhood safety and district-level crime rate in our analytic model, which past studies have failed.
- Causal relationships cannot be inferred from the cross-sectional data.

## INTRODUCTION

Crime is one of the major problems in many metropolitan areas across countries. Although city crime rates have dropped globally since the mid-1990s,<sup>1</sup> there are still large variations and dramatic fluctuations across cities.<sup>2</sup> Past criminological studies revealed that variations in crime rates were explained by characteristics of metropolitan areas, such as population sizes, ethnic heterogeneity, geographic mobility, economic segregation, unemployment rate, poverty level and degree of social integration and control.<sup>2-4</sup> Thus, many governments have made great efforts to reduce the crime rates especially in metropolitan areas by intervening in those characteristics to ensure the safety of their residents.

Safety from crime is not only an essential human need in daily life, but also a prerequisite to human health.<sup>5</sup> A body of past studies has reported the relationship between residents' perceptions of neighborhood safety and their health outcomes.<sup>6,7</sup> For example, one UK survey with 407 adults reported that fear of crime was significantly associated with self-rated health and mental well-being.<sup>8</sup> Ziersch and Baum<sup>9</sup> showed that perceived neighborhood safety was related to physical and mental health among 2,400 residents in western suburbs of Adelaide, Australia.

However, these earlier studies suffer from the following limitations. First, most of previous studies used individual-level neighborhood perceived safety as exposure variable, which could be influenced by several factors such as prior individual experience of victimization or individual health conditions other than neighborhood-level safety.<sup>10,11</sup> This could be particularly a critical issue in previous cross-sectional studies because of the potential reverse causation, meaning that the sick are more likely to perceive their neighborhood as unsafe.<sup>7,12</sup> The second limitation is lack of representativeness of samples within the operationalized definition of neighborhood. Few

1  
2  
3  
4 studies had enough sample size or the sample size within neighborhood to be representative for  
5  
6 each neighborhood.<sup>6,8,13</sup> Unless the responses are obtained from a representative sample of  
7  
8 participants within each neighborhood, aggregated perceived neighborhood measures can  
9  
10 potentially be prone to measurement errors. The final limitation is that previous studies did not  
11  
12 adjust for district-level crime rate as a potential confounder although crime-rate has been  
13  
14 reported to influence perception of neighborhood safety as well as residents' health outcomes.  
15  
16  
17

18  
19 In this study, we assessed the district-level safety, which was obtained by aggregating responses  
20  
21 from the residents that are representative samples for each administrative district in Seoul, the  
22  
23 capital of South Korea. Then, using multilevel analysis to account for the hierarchical structure  
24  
25 of the data, we examined associations between district-level safety and self-rated health after  
26  
27 adjusting for potential confounders including individual-level perceived neighborhood safety and  
28  
29 district-level crime rate.  
30  
31  
32  
33  
34  
35  
36

## 37 **METHODS**

### 38 **Study population**

39  
40 Data were obtained from the Seoul Welfare Panel Study (SWPS), which tracked a representative  
41  
42 sample of households residing in 25 administrative districts in Seoul, South Korea. The SWPS  
43  
44 was launched in 2008 by the Seoul Welfare Foundation. The 1<sup>st</sup> wave of the survey was  
45  
46 conducted in 2008 and its supplementary survey targeting the low-income households was  
47  
48 implemented in 2009. The SWPS was suspended after the 2nd wave of the survey was conducted  
49  
50 in 2010 September. The survey employed a two-stage stratified cluster sampling approach where  
51  
52 a representative sample of census tracts for each district was first drawn, and then households  
53  
54  
55  
56  
57  
58  
59  
60

1  
2  
3  
4 were randomly selected within those sampled census tracts at baseline. A household  
5  
6 representative answered household survey and all members of a household whose age is 15 or  
7  
8 older were interviewed. A total of 7,761 individuals completed the interviews in Wave 1. The  
9  
10 SWPS have been publicly released [<http://panel.welfare.seoul.kr>]. Because all respondents  
11  
12 answered on questionnaire items we used in this study, we were able to conduct our analyses  
13  
14 based on the entire sample participated in the first wave of SWPS without listwise deletion or  
15  
16 missing value imputation for handling missing data. The final sample used in the data analysis of  
17  
18 this research consists of 7,761 individuals from 3,665 households from 25 administrative districts  
19  
20 in Seoul. The number of households in each district was 146.6 on average, ranging from 108 to  
21  
22 198. This research received IRB exemption from Division of Research Affairs at the San Diego  
23  
24 State University.  
25  
26  
27  
28  
29  
30

### 31 **Exposure: district-level perceived neighborhood safety**

32  
33 Perceived neighborhood safety was assessed through the household survey using a question  
34  
35 about how much a household representative agrees with the following statement: ‘My current  
36  
37 residential environment is unsafe’. Respondents answered in a five level ordinal scale from  
38  
39 “strongly agree” (coded as 1) to “strongly disagree” (coded as 5). The answer was then  
40  
41 dichotomized into “unsafe” (coded as 0) for the response, 1-2 and “safe” (coded as 1) for the  
42  
43 response, 3-5. The binary responses from household representatives were aggregated to calculate  
44  
45 an administrative district-level perceived neighborhood safety by taking a weighted average of  
46  
47 household-specific perceived safety within each district with the household size used as weight.  
48  
49 Such aggregation results in that the district-level perceived neighborhood safety is essentially  
50  
51 sample proportion of individuals who answered “safe” within each district.  
52  
53  
54  
55  
56  
57  
58  
59  
60

### Outcome: self-rated health

Poor self-rated health was assessed through the individual interview using the question “How would you rate your overall health?” This question is on the ordinal level, ranging from “very good” (coded as 1) to “very poor” (coded as 5). The response was then dichotomized into “good health” (coded as 0) for response, 1-3 and “poor health” (coded as 1) for response, 4-5. Although self-rated health cannot assess multi-dimensional aspects of health conditions, it is known to be a reliable predictor of life-expectancy after adjusting for other health indicators.<sup>14</sup>

### Covariates

We included several confounders in the data analysis. For individual-level confounders, we have sex, age group (15-19 yrs, 20-29 yrs, 30-39 yrs, 40-49 yrs, 50-59 yrs, 60-69 yrs, and 70 years or more), education level (elementary or less, junior high school, high school, college graduate, university graduate, and graduate school or more), marital status (married or cohabiting vs. others), and job status (employed vs. unemployed), household income with six categories (1,000,000 KRW or less, 1,010,000-2,000,000 KRW, 2,010,000-3,000,000 KRW, 3,010,000-4,000,000 KRW, 4,010,000-5,000,000 KRW, and Above 5,000,000 KRW), and individual-level neighborhood safety (unsafe vs. safe). Because neighborhood safety was assessed solely from the household survey, we assigned the value of perceived neighborhood safety measured from each household representative to all members of the household.

We considered district-level crime rate as a potential covariate at district-level because it can influence residents’ health as well as perceived safety. District-level crime rates for each of 25 administrative district (‘Gu’) in Seoul were collected from the ‘Analytical report on crimes

1  
2  
3  
4 (2008)' that is annually published by supreme prosecutors' office in South Korea.<sup>15</sup> District-level  
5  
6 crime rate was calculated by dividing the total number of crimes by the total number of residents  
7  
8 in each district (Expressed in number/year/1000persons). Using an administrative district  
9  
10 identifier in the SWPS, we linked the official crime rate of each administrative district to our  
11  
12 final dataset of the SWPS.  
13  
14

### 15 16 17 **Data analysis**

18  
19 Mixed effect logistic regression was used to investigate the association between district-level  
20  
21 safety and self-rated health. Because of the hierarchical structure in our data (i.e., individuals are  
22  
23 nested in households, which in turn are nested in districts), within-household and within-district  
24  
25 correlations were incorporated using household-specific and district-specific random intercepts.  
26  
27 We made stepwise adjustments of potential confounders in the data analysis. First, we adjusted  
28  
29 for potential confounders including sex, age, education level, job status, marital status, and  
30  
31 household-level income. Second, we added individual-level perceived neighborhood safety to the  
32  
33 previously listed confounders for adjustment. Finally, we examined the association after  
34  
35 adjusting for district-level crime rate in addition to all of the previously mentioned confounders.  
36  
37 All of the confounders were included as categorical variables and the district-level safety was  
38  
39 included after standardization for simple interpretation in the model. All computations were done  
40  
41 using R statistical software.  
42  
43  
44  
45  
46  
47  
48  
49  
50  
51

## 52 **RESULTS**

53  
54  
55  
56  
57  
58  
59  
60

1  
2  
3  
4 Table 1 presents the distribution of the study population and the prevalence of poor self-rated  
5 health by each of the individual-level, household-level, and district-level characteristics. Overall,  
6 poor self-rated health was reported at 20.9% (1,620 out of 7,761 participants). The proportion  
7 was higher for women and showed an increasing pattern with age. Lower proportions were  
8 observed for participants in lower education levels. The unemployed and people living in an  
9 unsafe neighborhood exhibited higher prevalence of poor self-rated health compared to the  
10 employed and those living in a safe neighborhood. Household income were fairly equally  
11 distributed in the SWPS. As to the district-level safety and crime rate, given the overall mean of  
12 each variable, relative size of each standard deviation shows that there were considerable  
13 variations among the 25 districts.  
14  
15  
16  
17  
18  
19  
20  
21  
22  
23  
24  
25  
26  
27  
28

29 District-level safety was significantly associated with poor self-rated health while different sets  
30 of confounders being step-wisely adjusted (Table 2). Living in a district where its safety level is  
31 1 standard deviation (0.08) higher resulted in 13% lower odds of reporting self-rated poor health  
32 status (OR: 0.87, 95% CI: 0.78, 0.97) after adjusting for sex, age, education level, job status,  
33 marital status, and household-level income. When adjusted for individual-level safety, this  
34 association was slightly attenuated but still significant (OR: 0.88, 95% CI: 0.79, 0.98). When we  
35 controlled for district-level crime, the magnitude of this association was slightly increased and  
36 remained significant (OR: 0.86, 95% CI: 0.77, 0.96).  
37  
38  
39  
40  
41  
42  
43  
44  
45  
46  
47  
48  
49

## 50 DISCUSSION

51  
52 Evidence from our study indicated that district-level perceived safety, which was assessed by  
53 aggregating responses from residents in each district, was significantly associated with poor self-  
54  
55  
56  
57  
58  
59  
60



1  
2  
3  
4 rated health even after controlling for demographic information and SES. Notably, this  
5  
6 association was still robust when we additionally adjusted for district-level crime rate and  
7  
8 individual reporting of perceived neighborhood safety.  
9  
10

11  
12 Our findings are in line with previous research that showed associations between perceived  
13  
14 neighborhood safety and health outcomes. Past studies have also reported that residents who  
15  
16 perceived that their neighborhood had more severe problems were more likely to experience  
17  
18 greater anxiety, stress, and depression.<sup>6,16</sup> The studies sampled women, children, and the elderly  
19  
20 also provided consistent evidence of a relationship between perceived crime risk and physical  
21  
22 health.<sup>7,13</sup>  
23  
24  
25  
26

27  
28 In this study, district-level crime rate was not associated with self-rated health in the fully  
29  
30 adjusted model. Furthermore, our post-hoc analysis showed that there was no statistically  
31  
32 significant relationship between district crime rate and residents' self-rated health regardless of  
33  
34 covariate adjustment, although district-level crime rate could be a major influence on district-  
35  
36 level safety. This finding is different from past studies that reported a significant relationship  
37  
38 between district crime rate and residents' health such as coronary heart disease<sup>17</sup> and low birth  
39  
40 weight.<sup>18</sup>  
41  
42  
43  
44

45  
46 The differential association between district-level perceived safety and crime rate in relation to  
47  
48 self-rated health could be explained by three ways. First, mass media may increase individual-  
49  
50 level perceived neighborhood insecurity regardless of their neighborhood crime rates, especially  
51  
52 when they reported the crime in ways of exaggeration.<sup>19,20</sup> The mass media tend to emphasize  
53  
54 criminal stories which can draw attention from audience.<sup>21</sup> Previous studies called this  
55  
56  
57  
58  
59  
60

1  
2  
3  
4  
5 phenomenon as "cultivation effect" meaning that exposure to the world of television cultivates  
6 exaggerated perceptions of viewers and magnifies viewers' fear about crime.<sup>22</sup> The residents who  
7  
8  
9 watched news on neighborhood crimes may perceive their neighborhood more vulnerable  
10  
11 regions to crime. Moreover, mass media may also increase the individual-level perceived  
12  
13 neighborhood safety regardless of their objective neighborhood crime rates.<sup>20</sup> Second, different  
14  
15 types of crime would have different effects on the perceived risk or fear of crime. For example,  
16  
17 murder, rape, and personal theft may have higher effects on the fear of crime than larceny and  
18  
19 auto-theft. Hence, total crime rate that was used in this research might not be sophisticated  
20  
21 enough to clearly capture the association between the prevalence of crime in the district and the  
22  
23 residents' health condition.<sup>23</sup> However, when we conducted a post-hoc analysis using a different  
24  
25 measure, '5 index crime rate', which includes major five serious crimes (i.e. murder, robbery,  
26  
27 rape, assault and theft) that has been adopted by Korean police to indicate violent crime rate, still  
28  
29 we could not find any association with residents' self-rated health. Finally, if social and physical  
30  
31 resources of neighborhood are deteriorated or deprived, residents tend to perceive neighborhood  
32  
33 safety more irrespective of the objective neighborhood crime rate.<sup>24</sup> The poor quality of social  
34  
35 and physical environment, such as dilapidated houses or having no formal or informal  
36  
37 neighborhood networks, may work as a trigger to make residents perceive their neighborhood  
38  
39 dangerous.<sup>25,26</sup>

40  
41  
42  
43  
44  
45  
46  
47  
48 There could be several pathways linking district-level perceived neighborhood safety to self-  
49  
50 rated health irrespective of neighborhood crime rate and individual-level perceived neighborhood  
51  
52 safety. First, higher district-level perceived safety can cause less outdoor physical activities<sup>7,27</sup>  
53  
54 leading to poor health. Second, elevated district-level perceived safety iteratively aggravates  
55  
56  
57  
58  
59  
60

1  
2  
3  
4 social supports or deteriorates physical environments, in turn, it may harm mental and physical  
5 outcomes.<sup>28</sup> Last, elevated district-level perceived safety may be a latent stressor causing chronic  
6 stress status that could undermine residents' mental health.<sup>29</sup>  
7  
8  
9

10  
11  
12 Our study has several limitations. First, potential reverse causation is of concern due to its cross-  
13 sectional study design, implying that people with poor-self rated health are more likely to  
14 perceive their neighborhood as unsafe. However, because the association was still significant  
15 after adjusting for individual-perceived safety, which is a critical pathway of this reverse  
16 causation, so we believe that the potential reverse causation cannot fully explain the observed  
17 association. Second, this study assessed perceived neighborhood safety through a single-item  
18 measure. This item may not reflect multi-dimensional aspects of the neighborhood safety.  
19  
20  
21  
22  
23  
24  
25  
26  
27  
28  
29

30  
31 Despite these limitations, our study has the strength in that we used representative samples for  
32 each operationalized administrative district, which enabled multi-level analysis using an district-  
33 level aggregate measure of perceived safety whereas most of previous studies used individual  
34 reporting of perceived safety as an exposure variable. Furthermore, to our knowledge, this is one  
35 of the first studies to examine the association between district-level perceived neighborhood  
36 safety and health outcome after adjusting for district-level crime rate.  
37  
38  
39  
40  
41  
42  
43  
44

45  
46 In sum, our study showed that district-level perceived safety was associated with residents' poor  
47 self-rated health even after controlling for demographic influences, SES, district-level crime rate,  
48 and individual-level perceived safety. Our study results evoke the importance of local authorities  
49 (or governments) to make efforts toward improving neighborhood safety to enhance residents'  
50 health.  
51  
52  
53  
54  
55  
56  
57  
58  
59  
60

Table 1. Descriptive statistics for the independent variables and their associations with self-rated poor health (N=7761)

| Variables                                                      | Total       | Prevalence of poor self-rated health |              |
|----------------------------------------------------------------|-------------|--------------------------------------|--------------|
|                                                                | N           | N (%)                                | p-values     |
| <i>Individual level variables (N=7761)</i>                     |             |                                      |              |
| <b>Sex</b>                                                     |             |                                      | <0.0001      |
| Male                                                           | 3547        | 599 (16.9)                           |              |
| Female                                                         | 4214        | 1021 (24.2)                          |              |
| <b>Age (years)</b>                                             |             |                                      | <0.0001      |
| 15-19                                                          | 536         | 17 (3.2)                             |              |
| 20-29                                                          | 973         | 26 (2.7)                             |              |
| 30-39                                                          | 1577        | 92 (5.8)                             |              |
| 40-49                                                          | 1425        | 185 (13.0)                           |              |
| 50-59                                                          | 1139        | 242 (21.2)                           |              |
| 60-69                                                          | 1130        | 482 (42.7)                           |              |
| 70 or more                                                     | 981         | 576 (58.7)                           |              |
| <b>Job Status</b>                                              |             |                                      | <0.0001      |
| Employed                                                       | 3199        | 293 (9.2)                            |              |
| Unemployed                                                     | 4562        | 1327 (29.1)                          |              |
| <b>Education Level</b>                                         |             |                                      | <0.0001      |
| Elementary school or less                                      | 1143        | 664 (58.1)                           |              |
| Middle school                                                  | 703         | 271 (38.5)                           |              |
| High school                                                    | 2483        | 433 (17.4)                           |              |
| College graduate                                               | 572         | 46 (8.0)                             |              |
| University graduate                                            | 2516        | 185 (7.4)                            |              |
| Graduate school or more                                        | 344         | 21 (6.1)                             |              |
| <b>Marital status</b>                                          |             |                                      | 0.151        |
| Married/cohabiting                                             | 5059        | 1031 (20.4)                          |              |
| Others                                                         | 2702        | 589 (21.8)                           |              |
| <b>Individual-level safety</b>                                 |             |                                      | <0.0001      |
| Safe                                                           | 6777        | 1361 (20.1)                          |              |
| Unsafe                                                         | 984         | 259 (26.3)                           |              |
| <i>Household level variables (N=3665)</i>                      |             |                                      |              |
| <b>Household Income</b>                                        |             |                                      |              |
| 1,000,000 KRW or less                                          | 770         |                                      |              |
| 1,010,000-2,000,000 KRW                                        | 772         |                                      |              |
| 2,010,000-3,000,000 KRW                                        | 656         |                                      |              |
| 3,010,000-4,000,000 KRW                                        | 510         |                                      |              |
| 4,010,000-5,000,000 KRW                                        | 345         |                                      |              |
| Above 5,000,000 KRW                                            | 612         |                                      |              |
| <i>District level variables (N=25)</i>                         |             |                                      |              |
| <b>District-level perceived safety (mean (SD))<sup>a</sup></b> | <u>Mean</u> | <u>S.D.</u>                          | <u>Range</u> |
|                                                                | 0.87        | 0.08                                 | 0.68-0.98    |

1  
2  
3  
4  
5 **District-level crime rate (mean (SD))<sup>b</sup>** 4.63 2.94 2.25-16.31  
6

---

7 <sup>a</sup> District-specific average of individual-level safety

8 <sup>b</sup> Expressed in number/year/1000persons  
9  
10  
11  
12  
13  
14  
15  
16  
17  
18  
19  
20  
21  
22  
23  
24  
25  
26  
27  
28  
29  
30  
31  
32  
33  
34  
35  
36  
37  
38  
39  
40  
41  
42  
43  
44  
45  
46  
47  
48  
49  
50  
51  
52  
53  
54  
55  
56  
57  
58  
59  
60

For peer review only

1  
2  
3  
4  
5  
6  
7  
8  
9  
10  
11  
12  
13  
14  
15  
16  
17  
18  
19  
20  
21  
22  
23  
24  
25  
26  
27  
28  
29  
30  
31  
32  
33  
34  
35  
36  
37  
38  
39  
40  
41  
42  
43  
44  
45  
46  
47  
48  
49

Table 2. Associations between district-level perceived safety and poor self-rated health

|                                              | Unadjusted |              | Adjusted <sup>a</sup> |              |       |              |        |              |
|----------------------------------------------|------------|--------------|-----------------------|--------------|-------|--------------|--------|--------------|
|                                              | OR         | 95% CI       | OR                    | 95% CI       | OR    | 95% CI       | OR     | 95% CI       |
| District-level perceived safety <sup>b</sup> | 0.83***    | (0.76, 0.91) | 0.87*                 | (0.78, 0.97) | 0.88* | (0.79, 0.98) | 0.86** | (0.77, 0.96) |
| Individual-level perceived safety            |            |              |                       |              | 0.83  | (0.66, 1.04) | 0.82   | (0.65, 1.04) |
| District-level crime rate                    |            |              |                       |              |       |              | 0.97   | (0.93, 1.01) |

<sup>a</sup> Adjusted for sex, age, education level, job status, marital status, and household-level income

<sup>b</sup> Aggregated responses about neighborhood safety among residents in the same district. The variables was included in the data analysis after standardization

\* p-value<0.05, \*\* p-value<0.01

1  
2  
3 Acknowledgments: None  
4  
5  
6

7  
8 Competing interests: None  
9  
10

11  
12 This research received no specific grant from any funding agency in the public, commercial or  
13 not-for-profit sectors.  
14  
15

16  
17  
18 Contributorship: SSK coordinated the design, analysis and writing the manuscript. JC, KP, YC, SP, JH  
19 participated in the design, analysis and in preparing the manuscript. All of the authors contributed to  
20 read, edited and approved of the final draft of the manuscript.  
21  
22

23  
24  
25 Data sharing: No additional data are available.  
26  
27  
28  
29  
30  
31  
32  
33  
34  
35  
36  
37  
38  
39  
40  
41  
42  
43  
44  
45  
46  
47  
48  
49  
50  
51  
52  
53  
54  
55  
56  
57  
58  
59  
60

## REFERENCES

1. Tseloni A, Mailley J, Farrell G, et al. Exploring the international decline in crime rates. *European Journal of Criminology*. 2010;7(5):375-394.
2. McCall PL, Land KC, Parker KF. Heterogeneity in the rise and decline of city-level homicide rates, 1976–2005: A latent trajectory analysis. *Social Science Research*. 2011;40(1):363-378.
3. Sampson RJ, Raudenbush SW, Earls F. Neighborhoods and violent crime: A multilevel study of collective efficacy. *Science*. 1997;277(5328):918-924.
4. Patterson EB. Poverty, income inequality, and community crime rates. *Criminology*. 1991;29(4):755-776.
5. Krug EG, Mercy JA, Dahlberg LL, et al. The world report on violence and health. *The lancet*. 2002;360(9339):1083-1088.
6. Gary TL, Stark SA, LaVeist TA. Neighborhood characteristics and mental health among African Americans and whites living in a racially integrated urban community. *Health & Place*. 2007;13(2):569-575.
7. Tucker-Seeley RD, Subramanian S, Li Y, et al. Neighborhood safety, socioeconomic status, and physical activity in older adults. *American journal of preventive medicine*. 2009;37(3):207-213.
8. Green G, Gilbertson JM, Grimsley MF. Fear of crime and health in residential tower blocks A case study in Liverpool, UK. *The European Journal of Public Health*. 2002;12(1):10-15.
9. Ziersch AM, Baum FE, MacDougall C, et al. Neighbourhood life and social capital: the implications for health. *Social science & medicine*. 2005;60(1):71-86.
10. Raudenbush SW. *Hierarchical linear models: Applications and data analysis methods*. Vol 1: Sage; 2002.
11. Kruger DJ, Reischl TM, Gee GC. Neighborhood social conditions mediate the association between physical deterioration and mental health. *American journal of community psychology*. 2007;40(3-4):261-271.
12. Wen M, Hawkey LC, Cacioppo JT. Objective and perceived neighborhood environment, individual SES and psychosocial factors, and self-rated health: An analysis of older adults in Cook County, Illinois. *Social science & medicine*. 2006;63(10):2575-2590.
13. White M, Kasl SV, Zahner GE, et al. Perceived crime in the neighborhood and mental health of women and children. *Environment and Behavior*. 1987;19(5):588-613.
14. Idler EL, Benyamini Y. Self-rated health and mortality: a review of twenty-seven community studies. *J Health Soc Behav*. Mar 1997;38(1):21-37.
15. Supreme Prosecutors' Office Republic Of Korea. *Analytical Report on Crimes (2008)*. 2009.
16. Curry A, Latkin C, Davey-Rothwell M. Pathways to depression: The impact of neighborhood violent crime on inner-city residents in Baltimore, Maryland, USA. *Social Science & Medicine*. 2008;67(1):23-30.
17. Sundquist K, Theobald H, Yang M, et al. Neighborhood violent crime and unemployment increase the risk of coronary heart disease: a multilevel study in an urban setting. *Social science & medicine*. 2006;62(8):2061-2071.
18. O'Campo P, Xue X, Wang M-C, et al. Neighborhood risk factors for low birthweight in Baltimore: a multilevel analysis. *American Journal of Public Health*. 1997;87(7):1113-1118.
19. Warr M. Fear of victimization. *Public Perspective*. 1993;5:25-28.
20. Romer D, Jamieson KH, Aday S. Television news and the cultivation of fear of crime. *Journal of communication*. 2003;53(1):88-104.



- 1
  - 2
  - 3
  - 4
  - 5
  - 6
  - 7
  - 8
  - 9
  - 10
  - 11
  - 12
  - 13
  - 14
  - 15
  - 16
  - 17
  - 18
  - 19
  - 20
  - 21
  - 22
  - 23
  - 24
  - 25
  - 26
  - 27
  - 28
  - 29
  - 30
  - 31
  - 32
  - 33
  - 34
  - 35
  - 36
  - 37
  - 38
  - 39
  - 40
  - 41
  - 42
  - 43
  - 44
  - 45
  - 46
  - 47
  - 48
  - 49
  - 50
  - 51
  - 52
  - 53
  - 54
  - 55
  - 56
  - 57
  - 58
  - 59
  - 60
21. Lipschultz JH, Hilt ML. *Crime and local television news: Dramatic, breaking, and live from the scene*. Routledge; 2002.
22. Gerbner G. Cultivation analysis: An overview. *Mass Communication and Society*. 1998;1(3-4):175-194.
23. Meier RF, Short JF. CRIME AS HAZARD: PERCEPTIONS OF RISK AND SERIOUSNESS\*. *Criminology*. 1985;23(3):389-400.
24. Carpiano RM. Toward a neighborhood resource-based theory of social capital for health: Can Bourdieu and sociology help? *Social science & medicine*. 2006;62(1):165-175.
25. Rodrigues CD. Civil democracy, perceived risk, and insecurity in Brazil: An extension of the systemic social control model. *The Annals of the American Academy of Political and Social Science*. 2006;605(1):242-263.
26. Gibson CL, Zhao J, Lovrich NP, et al. Social integration, individual perceptions of collective efficacy, and fear of crime in three cities. *Justice Quarterly*. 2002;19(3):537-564.
27. Roman CG, Chalfin A. Fear of walking outdoors: a multilevel ecologic analysis of crime and disorder. *American journal of preventive medicine*. 2008;34(4):306-312.
28. Kim S-S, Chung Y, Perry MJ, et al. Association between interpersonal trust, reciprocity, and depression in South Korea: A prospective analysis. *PloS one*. 2012;7(1):e30602.
29. Stockdale SE, Wells KB, Tang L, et al. The importance of social context: neighborhood stressors, stress-buffering mechanisms, and alcohol, drug, and mental health disorders. *Social Science & Medicine*. 2007;65(9):1867-1881.

1  
2  
3  
4 Jongho Heo, MPH, Doctoral student  
5 Public Health Joint Doctoral Program,  
6 San Diego State University & University of California, San Diego 9245  
7 Sky Park Court, Ste. 100, San Diego, CA 92123  
8 Phone: (619) 793-9738  
9 E-mail: joheo@ucsd.edu; jjongho77@gmail.com  
10

11 Editor-in-Chief  
12 BMJ open  
13  
14  
15  
16  
17  
18

19 **Dear Editor-in-Chief in the BMJ open**  
20

21 This is the revision of our paper, "Association between district-level safety and self-rated health:  
22 a multilevel study in an urban setting". We really appreciate that the reviewer provided precious  
23 comments on how to improve the manuscript.  
24  
25  
26  
27  
28

29 Sincerely yours,  
30 Jongho Heo on behalf of co-authors  
31  
32  
33  
34  
35  
36  
37  
38  
39  
40  
41  
42  
43  
44  
45  
46  
47  
48  
49  
50  
51  
52  
53  
54  
55  
56  
57  
58  
59  
60

1  
2  
3  
4  
5  
6  
7  
8  
9  
10  
11  
12  
13  
14  
15  
16  
17  
18  
19  
20  
21  
22  
23  
24  
25  
26  
27  
28  
29  
30  
31  
32  
33  
34  
35  
36  
37  
38  
39  
40  
41  
42  
43  
44  
45  
46  
47  
48  
49  
50  
51  
52  
53  
54  
55  
56  
57  
58  
59  
60

## Association between district-level safety and self-rated health: a multilevel study in an urban setting

Seung-Sup Kim MD, ScD, Jaesung Choi PhD, Kisoo Park PhD, Yeonseung Chung PhD, Sangjo Park BA, Jongho Heo\*

Seung-Sup Kim

Department of Public Health Sciences, Korea University, Seoul, Republic of Korea, Department of Social and Behavioral Sciences, Harvard School of Public Health, Boston, US, Department of Environmental and Occupational Health, The George Washington University School of Public Health and Health Services, Washington, DC, US

Jaesung Choi

Department of Economics, Sungkyunkwan University, Seoul, Republic of Korea

Kisoo Park

Department of Healthcare Management, Korea University, Seoul, Republic of Korea

Yeonseung Chung

Department of Mathematical Sciences, Korea Advanced Institute of Science and Technology, Daejeon, Republic of Korea

Sangjo Park

Master's program, Department of Communication, Seoul National University, Seoul, Republic of Korea

Jongho Heo

Public Health Joint Doctoral Program, San Diego State University & University of California, San Diego, US

Corresponding Author: Jongho Heo

Contact: +1-619-793-9738

Fax: +1-619-594-5888

E-mail: [joheo@ucsd.edu](mailto:joheo@ucsd.edu)

Public Health Joint Doctoral Program, San Diego State University & University of California, San Diego, 9245 Sky Park Court, Ste. 100s, San Diego, CA, 92123, USA

1  
2  
3  
4  
5  
6  
7  
8  
9  
10  
11  
12  
13  
14  
15  
16  
17  
18  
19  
20  
21  
22  
23  
24  
25  
26  
27  
28  
29  
30  
31  
32  
33  
34  
35  
36  
37  
38  
39  
40  
41  
42  
43  
44  
45  
46  
47  
48  
49  
50  
51  
52  
53  
54  
55  
56  
57  
58  
59  
60

# Association between district-level safety and self-rated health: a multilevel study in an urban setting

## Abstract

**Objectives:** Several studies have reported the relationship between resident's perceived neighborhood safety and their health outcomes. However, those studies suffered from unreliability of neighborhood safety measure and potential residual confounding related to crime rates. In this study, using multilevel analysis to account for the hierarchical structure of the data, we examined associations between district-level safety and self-rated health after adjusting for potential confounders including individual-level perceived neighborhood safety and district-level crime rate.

**Design:** Cross-sectional study

**Setting:** We used the 1<sup>st</sup> wave of Seoul Welfare Panel Study, which has 7,761 individuals from 3,665 households in 25 administrative districts in Seoul, South Korea. District-level safety was obtained by aggregating responses from the residents that are representative samples for each administrative district in Seoul. ~~We controlled objective district level crime rate, individual level perceived neighborhood safety and socio-demographic factors as well.~~ To examine an association between district-level safety and residents' self-rated health, we used mixed effects logistic regression.

**Results:** Our results showed that higher district-level perceived safety, an aggregated measure of district residents' responses on neighborhood safety, was significantly associated with poor self-rated health after controlling for demographic influences and SES (OR: 0.87, 95% CI: 0.78-0.97). Notably, this association was still robust even when we additionally adjusted for district-level crime rate and individual-level perceived neighborhood safety (OR: 0.86, 95% CI: 0.77-0.96).

**Conclusions:** Our study highlights the importance of improving neighborhood safety to enhance resident health.

**Keywords:** perceived neighborhood safety, self-rated health, neighborhood crime rate, Seoul Welfare Panel Study, multilevel analysis

### **Strengths and limitations of this study**

- Multilevel analytic frame was used to examine an association between district-level safety and residents' self-rated health using representative samples of metropolis, Seoul, South Korea.
- We succeed in adjusting for potential confounders such as individual-level perceived neighborhood safety and district-level crime rate in our analytic model, which past studies have failed.
- Causal relationships cannot be inferred from the cross-sectional data.

## INTRODUCTION

Crime is one of the major problems in many metropolitan areas across countries. Although city crime rates have dropped globally since the mid-1990s,<sup>1</sup> there are still large variations and dramatic fluctuations across cities.<sup>2</sup> Past criminological studies revealed that variations in crime rates were explained by characteristics of metropolitan areas, such as population sizes, ethnic heterogeneity, geographic mobility, economic segregation, unemployment rate, poverty level and degree of social integration and control.<sup>2-4</sup> Thus, many governments have made great efforts to reduce the crime rates especially in metropolitan areas by intervening in those characteristics to ensure the safety of their residents.

Safety from crime is not only an essential human need in daily life, but also a prerequisite to human health.<sup>5</sup> A body of past studies has reported the relationship between residents' perceptions of neighborhood safety and their health outcomes.<sup>6,7</sup> For example, one UK survey with 407 adults reported that fear of crime was significantly associated with self-rated health and mental well-being.<sup>8</sup> Ziersch and Baum<sup>9</sup> showed that perceived neighborhood safety was related to physical and mental health among 2,400 residents in western suburbs of Adelaide, Australia.

However, these earlier studies suffer from the following limitations. First, most of previous studies used individual-level neighborhood perceived safety as exposure variable, which could be influenced by several factors such as prior individual experience of victimization or individual health conditions other than neighborhood-level safety. ~~First is the potential measurement error of the perceived neighborhood safety. The individual perception can be influenced by several factors such as prior individual experience of victimization, or individual health conditions other than neighborhood-level safety.~~<sup>10,11</sup> This could be particularly a critical issue in previous cross-

1  
2  
3  
4 sectional studies because of the potential reverse causation, meaning that the sick are more likely  
5 to perceive their neighborhood as unsafe. This could be particularly a critical issue in previous  
6 cross-sectional studies which did not control for individuals' safety perception because of the  
7 potential reverse causation, meaning that the sick are more likely to perceive their neighborhood  
8 as unsafe.<sup>7,12</sup> The second limitation is lack of representativeness of samples within the  
9 operationalized definition of neighborhood. Few studies The had enough sample size or the  
10 sample size within neighborhood of previous studies was too small to be representative for each  
11 neighborhood.<sup>6,8,13</sup> Unless the responses are obtained from a representative sample of  
12 participants within each neighborhood, aggregated perceived neighborhood measures can  
13 potentially be prone to measurement errors. Also, this unavailability in appropriate neighborhood  
14 measure may explain why there is scant hierarchical or multilevel study analysis which  
15 examined allows for estimating the influence of perceived neighborhood safety measures on  
16 residents' health outcomes. The final limitation is that previous studies did not adjust for district-  
17 level crime rate as a potential confounder although crime-rate has been reported to influence  
18 perception of neighborhood safety as well as residents' health outcomes.

19  
20  
21  
22  
23  
24  
25  
26  
27  
28  
29  
30  
31  
32  
33  
34  
35  
36  
37  
38  
39  
40  
41 In this study, we assessed the district-level safety, which was obtained by aggregating responses  
42 from the residents that are representative samples for each administrative district in Seoul, the  
43 capital of South Korea. Then, using multilevel analysis to account for the hierarchical structure  
44 of the data, we examined associations between district-level safety and self-rated health after  
45 adjusting for potential confounders including individual-level perceived neighborhood safety and  
46 district-level crime rate.

## METHODS

### Study population

Data were obtained from the Seoul Welfare Panel Study (SWPS), which tracked a representative sample of households residing in 25 administrative districts in Seoul, South Korea. The SWPS was launched in 2008 by the Seoul Welfare Foundation. The 1<sup>st</sup> wave of the survey was conducted in 2008 and its supplementary survey targeting the low-income households was implemented in 2009. The SWPS was suspended after the 2nd wave of the survey was conducted in 2010 September. The survey employed a two-stage stratified cluster sampling approach where a representative sample of census tracts for each district was first drawn, and then households were randomly selected within those sampled census tracts at baseline. A household representative answered household survey and all members of a household whose age is 15 or older were interviewed. A total of 7,761 individuals completed the interviews in Wave 1. The SWPS have been publicly released [<http://panel.welfare.seoul.kr>]. ~~Because a~~~~Because A~~~~all respondents answered on questionnaire items we used in this study, we were able to conduct our analyses based on the entire sample participated in the first wave of SWPS without listwise deletion or missing value imputation for handling missing data.~~~~there was no observation with missing variables,~~ the final sample used in the data analysis of this research consists of 7,761 individuals from 3,665 households from 25 administrative districts in Seoul. The number of households in each district was 146.6 on average, ranging from 108 to 198. This research received IRB exemption from Division of Research Affairs at the San Diego State University.

### Exposure: district-level perceived neighborhood safety



1  
2  
3  
4 Perceived neighborhood safety was assessed through the household survey using a question  
5  
6 about how much a household representative agrees with the following statement: ‘My current  
7  
8 residential environment is unsafe’. Respondents answered in a five level ordinal scale from  
9  
10 “strongly agree” (coded as 1) to “strongly disagree” (coded as 5). The answer was then  
11  
12 dichotomized into “unsafe” (coded as 0) for the response, 1-~~2~~3 and “safe” (coded as 1) for the  
13  
14 response, ~~3-5,4,5~~4-5. The binary responses from household representatives were aggregated to  
15  
16 calculate an administrative district-level perceived neighborhood safety by taking a weighted  
17  
18 average of household-specific perceived safety within each district with the household size used  
19  
20 as weight. Such aggregation implies results in that the district-level perceived neighborhood  
21  
22 safety is essentially a sample proportion of individuals who answered “safe” within each district.  
23  
24  
25  
26  
27  
28

### 29 **Outcome: self-rated health**

30  
31  
32 Poor self-rated health was assessed through the individual interview using the question “How  
33  
34 would you rate your overall health?” This question is on the Respondents answered within a five  
35  
36 ordinal level, scale ranging from “vVery good” (coded as 1) to “very poor” (coded as 5). The  
37  
38 response was then dichotomized into “good health” (coded as 0) for response, 1-3 and “poor  
39  
40 health” (coded as 1) for response, 4-5. Although self-rated health cannot assess multi-  
41  
42 dimensional aspects of health conditions, it is known to be a reliable predictor of life-expectancy  
43  
44 after adjusting for other health indicators.<sup>14</sup>  
45  
46  
47  
48

### 49 **Covariates**

50  
51  
52 We included several confounders in the data analysis. For individual-level confounders, we have  
53  
54 sex, age group (15-19 yrs, 20-29 yrs, 30-39 yrs, 40-49 yrs, 50-59 yrs, 60-69 yrs, and 70 years or  
55  
56  
57  
58  
59  
60

1  
2  
3  
4 more), education level (elementary or less, junior high school, high school, college graduate,  
5  
6 university graduate, and graduate school or more), marital status (married or cohabiting vs.  
7  
8 others), and job status (employed vs. unemployed), household income with six categories  
9  
10 (1,000,000 KRW or less, 1,010,000-2,000,000 KRW, 2,010,000-3,000,000 KRW, 3,010,000-  
11  
12 4,000,000 KRW, 4,010,000-5,000,000 KRW, and Above 5,000,000 KRW), and individual-level  
13  
14 neighborhood safety (unsafe vs. safe). Because neighborhood safety was assessed solely from the  
15  
16 household survey, we assigned the value of perceived neighborhood safety measured from each  
17  
18 household representative to all members of the household.  
19  
20  
21  
22  
23

24 We considered district-level crime rate as a potential covariate at district-level because it can  
25  
26 influence residents' health as well as perceived safety. District-level crime rates for each of 25  
27  
28 administrative district ('Gu') in Seoul were collected from the 'Analytical report on crimes  
29  
30 (2008)' that is annually published by supreme prosecutors' office in South Korea.<sup>15</sup> District-level  
31  
32 cCrime rate was calculated by dividing the total number of crimes by the total number of  
33  
34 residents in each district (Expressed in number/year/1000persons). Using an administrative  
35  
36 district identifier in the SWPS, we linked the official crime rate of each administrative district to  
37  
38 our final dataset of the SWPS.  
39  
40  
41  
42  
43

#### 44 **Data analysis**

45  
46 Mixed effects logistic regression was used to investigate the association between district-level  
47  
48 safety and self-rated health. Because of the hierarchical structure in our data (i.e., individuals are  
49  
50 nested in households, which in turn are nested in districts), within-household and within-district  
51  
52 correlations were incorporated using household-specific and district-specific random intercepts.  
53  
54  
55 We made stepwise adjustments of potential confounders in the data analysis. First, we adjusted  
56  
57  
58  
59  
60

1  
2  
3  
4 for potential confounders including sex, age, education level, job status, marital status, and  
5  
6 household-level income. Second, we added individual-level perceived neighborhood safety to the  
7  
8 previously listed confounders for adjustment. Finally, we examined the association after  
9  
10 adjusting for district-level crime rate in addition to all of the previously mentioned confounders.  
11  
12 All of the confounders were included as categorical variables and the district-level safety was  
13  
14 included after standardization for simple interpretation in the model. All computations were done  
15  
16 using R statistical software.  
17  
18  
19  
20  
21  
22  
23  
24

## 25 RESULTS

26  
27  
28 Table 1 presents the distribution of the study population and the prevalence of poor self-rated  
29  
30 health by each of the individual-level, household-level, and district-level characteristics. Overall,  
31  
32 poor self-rated health was reported at 20.9% (1,620 out of 7,761 participants). The proportion  
33  
34 was higher for women and showed an increasing pattern with age. Lower proportions were  
35  
36 observed for participants in lower education levels. The unemployed and ~~the group of people~~  
37  
38 living in an unsafe neighborhood exhibited higher prevalence of poor self-rated health compared  
39  
40 to the employed and ~~those the group living~~ in a safe neighborhood. Household income were  
41  
42 fairly equally distributed in the SWPS. As to the district-level safety and crime rate, given the  
43  
44 overall mean of each variable, relative size of each standard deviation shows that there ~~were~~  
45  
46  
47  
48  
49  
50 considerable variations among the 25 districts.

51  
52  
53 District-level safety was significantly associated with poor self-rated health while different sets  
54  
55 of confounders being step-wisely adjusted (Table 2). Living in a district where its safety level is  
56  
57  
58  
59  
60

1  
2  
3  
4 1 standard deviation (0.08) higher resulted in 13% lower odds of reporting self-rated poor health  
5  
6 status (OR: 0.87, 95% CI: 0.78, 0.97) after adjusting for sex, age, education level, job status,  
7  
8 marital status, and household-level income. When adjusted for individual-level safety, this  
9  
10 association was slightly attenuated but still significant (OR: 0.88, 95% CI: 0.79, 0.98). When we  
11  
12 controlled for district-level crime, the magnitude of this association was slightly increased and  
13  
14 remained significant (OR: 0.86, 95% CI: 0.77, 0.96).  
15  
16  
17  
18  
19  
20

## 21 DISCUSSION

22  
23 Evidence from our study indicated that district-level perceived safety, as-which was assessed by  
24  
25 aggregating responses from district-residents in each district, was significantly associated with  
26  
27 poor self-rated health even after controlling for demographic information graphic influences  
28  
29 and SES-SES. Notably, this association was still robust when we additionally adjusted for  
30  
31 district-level crime rate and individual reporting of -level perceived neighborhood safety.  
32  
33  
34  
35

36 Our findings are in line with previous research that showed associations between perceived  
37  
38 regional neighborhood safety and health outcomes. Past studies have also reported that residents  
39  
40 who perceived that their neighborhood had more severe problems were more likely to experience  
41  
42 greater anxiety, stress, and depression.<sup>6,16</sup> The studies sampled women, children, and the elderly  
43  
44 also provided consistent evidence of a relationship between perceived crime risk and physical  
45  
46 health.<sup>7,13</sup>  
47  
48  
49  
50

51 In this study, district-level crime rate was not associated with self-rated health in the fully  
52  
53 adjusted model. Furthermore, our post-hoc analysis showed that there was no statistically  
54  
55 significant relationship between district crime rate and residents' self-rated health regardless of  
56  
57  
58  
59  
60

1  
2  
3  
4 covariate adjustment, although district-level crime rate could be a major influence on district-  
5  
6 level safety. This finding is different from past studies that reported a significant relationship  
7  
8 between district crime rate and residents' health such as coronary heart disease<sup>17</sup> and low birth  
9  
10 weight.<sup>18</sup>  
11  
12

13  
14  
15 The differential association between ~~perceived~~-district-level perceived safety and crime rate in  
16  
17 relation to self-rated health could be explained by three ways. First, mass media may increase  
18  
19 individual-level perceived neighborhood insecurity regardless of their neighborhood crime rates,  
20  
21 especially when they reported the crime in ways of exaggeration.<sup>19,20</sup> The mass media tend to  
22  
23 emphasize criminal stories which can draw attention from audience.<sup>21</sup> Previous studies called  
24  
25 this phenomenon as "cultivation effect" meaning that exposure to the world of television  
26  
27 cultivates exaggerated perceptions of viewers and magnifies viewers' fear about crime.<sup>22</sup> The  
28  
29 residents who watched news on neighborhood crimes may perceive their neighborhood more  
30  
31 vulnerable regions to crime. Moreover, mass media may also increase the individual-level  
32  
33 perceived neighborhood safety ~~of individuals~~ regardless of their objective neighborhood crime  
34  
35 rates.<sup>20</sup> Second, different types of crime would have different effects on the perceived risk or fear  
36  
37 of crime. For example, murder, rape, and personal theft may have higher effects on the fear of  
38  
39 crime than larceny and auto-theft. Hence, total crime rate that was used in this research ~~to~~  
40  
41 ~~indicate district level crime rate might~~ would not be a sophisticated enough to clearly capture  
42  
43 proper measure when searching its the association between the prevalence of crime in the district  
44  
45 and with the residents' health condition.<sup>23</sup> However, when we conducted a post-hoc analysis  
46  
47 using a different measure, with '5 index crime rate', which includes major five serious  
48  
49 different crimes (i.e. murder, robbery, rape, assault and theft) that, which has been adopted by  
50  
51  
52  
53  
54  
55  
56  
57  
58  
59  
60

1  
2  
3  
4 Korean police to indicate violent crime rate, still we could not find any association was  
5  
6 observed with in relation to residents' self-rated health. Finally, if social and physical resources  
7  
8 of neighborhood are deteriorated or deprived, residents tend to perceive neighborhood safety  
9  
10 more irrespective of with the objective neighborhood crime rate.<sup>24</sup> The poor quality of social and  
11  
12 physical environment, such as dilapidated houses or having no formal or informal neighborhood  
13  
14 networks, may work as a trigger to make residents perceive their neighborhood dangerous.<sup>25,26</sup>  
15  
16  
17  
18  
19  
20  
21  
22  
23  
24  
25  
26  
27  
28  
29  
30  
31  
32  
33  
34  
35  
36  
37  
38  
39  
40  
41  
42  
43  
44  
45  
46  
47  
48  
49  
50  
51  
52  
53  
54  
55  
56  
57  
58  
59  
60

There could be several pathways linking these perceived neighborhood safety district-level  
perceived neighborhood safety to self-rated health irrespective of the objective-neighborhood  
crime rate and individual-level perceived neighborhood safety. First, higher district-level  
perceived safety can cause less outdoor physical activities<sup>7,27</sup> leading to poor health. Second,  
elevated district-level perceived safety iteratively aggravates social supports- or deteriorates  
physical environments, in turn, it may harm mental and physical outcomes.<sup>28</sup> Last, elevated  
district-level perceived safety may be a latent stressor causing chronic stress status that could  
undermine residents' mental health.<sup>29</sup>

Our study has several a-limitations. First, of potential reverse causation is of concern due to its  
cross-sectional study design, implying that people with poor-self rated health are more likely to  
perceive their neighborhood as unsafe. However, because the association was still significant  
after adjusting for individual-perceived safety, which is a critical pathway of this reverse  
causation, so we believe that the potential reverse causation cannot fully explain the observed  
association. Second, this study assessed perceived neighborhood safety through a single-item  
measure. This item may not reflect multi-dimensional aspects of the neighborhood safety.

1  
2  
3  
4  
5  
6  
7  
8  
9  
10  
11  
12  
13  
14  
15  
16  
17  
18  
19  
20  
21  
22  
23  
24  
25  
26  
27  
28  
29  
30  
31  
32  
33  
34  
35  
36  
37  
38  
39  
40  
41  
42  
43  
44  
45  
46  
47  
48  
49  
50  
51  
52  
53  
54  
55  
56  
57  
58  
59  
60

Despite the ~~eseis~~ limitations, our study has the strength in that we used representative samples for each operationalized administrative district, which enabled multi-level analysis using an district-level aggregate measure of perceived safety ~~as an exposure variable~~ whereas most of previous studies used individual reporting of perceived safety as an exposure variable. ~~Furthermore, t~~ Furthermore, we found a significant association after adjusting for other relevant potential confounder such as district crime rate that could influence both exposure and outcome variable ~~in this study~~. To our knowledge, this is one of the first studies ~~controlled for crime rate~~ to examine the association between district-level perceived neighborhood safety and health outcome after adjusting for district-level crime rate.

In sum, our study showed that district-level perceived safety was associated with residents' poor self-rated health even after controlling for demographic influences, SES, district-level crime rate, and individual-level perceived safety. Our study results evoke the importance of local authorities (or governments) to make efforts toward improving neighborhood safety to enhance residents' health.

Table 1. Descriptive statistics for the independent variables and their associations with self-rated poor health (N=7761)

| Variables                                                      | Total       | Prevalence of poor self-rated health |              |
|----------------------------------------------------------------|-------------|--------------------------------------|--------------|
|                                                                | N           | N (%)                                | p-values     |
| <i>Individual level variables (N=7761)</i>                     |             |                                      |              |
| <b>Sex</b>                                                     |             |                                      | <0.0001      |
| Male                                                           | 3547        | 599 (16.9)                           |              |
| Female                                                         | 4214        | 1021 (24.2)                          |              |
| <b>Age (years)</b>                                             |             |                                      | <0.0001      |
| 15-19                                                          | 536         | 17 (3.2)                             |              |
| 20-29                                                          | 973         | 26 (2.7)                             |              |
| 30-39                                                          | 1577        | 92 (5.8)                             |              |
| 40-49                                                          | 1425        | 185 (13.0)                           |              |
| 50-59                                                          | 1139        | 242 (21.2)                           |              |
| 60-69                                                          | 1130        | 482 (42.7)                           |              |
| 70 or more                                                     | 981         | 576 (58.7)                           |              |
| <b>Job Status</b>                                              |             |                                      | <0.0001      |
| Employed                                                       | 3199        | 293 (9.2)                            |              |
| Unemployed                                                     | 4562        | 1327 (29.1)                          |              |
| <b>Education Level</b>                                         |             |                                      | <0.0001      |
| Elementary school or less                                      | 1143        | 664 (58.1)                           |              |
| Middle school                                                  | 703         | 271 (38.5)                           |              |
| High school                                                    | 2483        | 433 (17.4)                           |              |
| College graduate                                               | 572         | 46 (8.0)                             |              |
| University graduate                                            | 2516        | 185 (7.4)                            |              |
| Graduate school or more                                        | 344         | 21 (6.1)                             |              |
| <b>Marital status</b>                                          |             |                                      | 0.151        |
| Married/cohabiting                                             | 5059        | 1031 (20.4)                          |              |
| Others                                                         | 2702        | 589 (21.8)                           |              |
| <b>Individual-level safety</b>                                 |             |                                      | <0.0001      |
| Safe                                                           | 6777        | 1361 (20.1)                          |              |
| Unsafe                                                         | 984         | 259 (26.3)                           |              |
| <i>Household level variables (N=3665)</i>                      |             |                                      |              |
| <b>Household Income</b>                                        |             |                                      |              |
| 1,000,000 KRW or less                                          | 770         |                                      |              |
| 1,010,000-2,000,000 KRW                                        | 772         |                                      |              |
| 2,010,000-3,000,000 KRW                                        | 656         |                                      |              |
| 3,010,000-4,000,000 KRW                                        | 510         |                                      |              |
| 4,010,000-5,000,000 KRW                                        | 345         |                                      |              |
| Above 5,000,000 KRW                                            | 612         |                                      |              |
| <i>District level variables (N=25)</i>                         |             |                                      |              |
| <b>District-level perceived safety (mean (SD))<sup>a</sup></b> | <u>Mean</u> | <u>S.D.</u>                          | <u>Range</u> |
|                                                                | 0.87        | 0.08                                 | 0.68-0.98    |



1  
2  
3  
4  
5 **District-level crime rate (mean (SD))<sup>b</sup>** 4.63 2.94 2.25-16.31  
6

---

7 <sup>a</sup> District-specific average of individual-level safety

8 <sup>b</sup> Expressed in number/year/1000persons  
9  
10  
11  
12  
13  
14  
15  
16  
17  
18  
19  
20  
21  
22  
23  
24  
25  
26  
27  
28  
29  
30  
31  
32  
33  
34  
35  
36  
37  
38  
39  
40  
41  
42  
43  
44  
45  
46  
47  
48  
49  
50  
51  
52  
53  
54  
55  
56  
57  
58  
59  
60

For peer review only

1  
2  
3  
4  
5  
6  
7  
8  
9  
10  
11  
12  
13  
14  
15  
16  
17  
18  
19  
20  
21  
22  
23  
24  
25  
26  
27  
28  
29  
30  
31  
32  
33  
34  
35  
36  
37  
38  
39  
40  
41  
42  
43  
44  
45  
46  
47  
48  
49

Table 2. Associations between district-level perceived safety and poor self-rated health

|                                              | Unadjusted |              | Adjusted <sup>a</sup> |              |       |              |        |              |
|----------------------------------------------|------------|--------------|-----------------------|--------------|-------|--------------|--------|--------------|
|                                              | OR         | 95% CI       | OR                    | 95% CI       | OR    | 95% CI       | OR     | 95% CI       |
| District-level perceived safety <sup>b</sup> | 0.83***    | (0.76, 0.91) | 0.87*                 | (0.78, 0.97) | 0.88* | (0.79, 0.98) | 0.86** | (0.77, 0.96) |
| Individual-level perceived safety            |            |              |                       |              | 0.83  | (0.66, 1.04) | 0.82   | (0.65, 1.04) |
| District-level crime rate                    |            |              |                       |              |       |              | 0.97   | (0.93, 1.01) |

<sup>a</sup> Adjusted for sex, age, education level, job status, marital status, and household-level income

<sup>b</sup> Aggregated responses about neighborhood safety among residents in the same district. The variables was included in the data analysis after standardization

\* p-value<0.05, \*\* p-value<0.01, \*\*\* p-value<0.001

1  
2  
3 Acknowledgments: None  
4  
5  
6

7  
8 Competing interests: None  
9  
10

11  
12 This research received no specific grant from any funding agency in the public, commercial or  
13 not-for-profit sectors.  
14  
15  
16  
17  
18  
19  
20  
21  
22  
23  
24  
25  
26  
27  
28  
29  
30  
31  
32  
33  
34  
35  
36  
37  
38  
39  
40  
41  
42  
43  
44  
45  
46  
47  
48  
49  
50  
51  
52  
53  
54  
55  
56  
57  
58  
59  
60

For peer review only

## REFERENCES

1. Tseloni A, Mailley J, Farrell G, Tilley N. Exploring the international decline in crime rates. *European Journal of Criminology*. 2010;7(5):375-394.
2. McCall PL, Land KC, Parker KF. Heterogeneity in the rise and decline of city-level homicide rates, 1976–2005: A latent trajectory analysis. *Social Science Research*. 2011;40(1):363-378.
3. Sampson RJ, Raudenbush SW, Earls F. Neighborhoods and violent crime: A multilevel study of collective efficacy. *Science*. 1997;277(5328):918-924.
4. Patterson EB. Poverty, income inequality, and community crime rates. *Criminology*. 1991;29(4):755-776.
5. Krug EG, Mercy JA, Dahlberg LL, Zwi AB. The world report on violence and health. *The lancet*. 2002;360(9339):1083-1088.
6. Gary TL, Stark SA, LaVeist TA. Neighborhood characteristics and mental health among African Americans and whites living in a racially integrated urban community. *Health & Place*. 2007;13(2):569-575.
7. Tucker-Seeley RD, Subramanian S, Li Y, Sorensen G. Neighborhood safety, socioeconomic status, and physical activity in older adults. *American journal of preventive medicine*. 2009;37(3):207-213.
8. Green G, Gilbertson JM, Grimsley MF. Fear of crime and health in residential tower blocks A case study in Liverpool, UK. *The European Journal of Public Health*. 2002;12(1):10-15.
9. Ziersch AM, Baum FE, MacDougall C, Putland C. Neighbourhood life and social capital: the implications for health. *Social science & medicine*. 2005;60(1):71-86.
10. Raudenbush SW. *Hierarchical linear models: Applications and data analysis methods*. Vol 1: Sage; 2002.
11. Kruger DJ, Reischl TM, Gee GC. Neighborhood social conditions mediate the association between physical deterioration and mental health. *American journal of community psychology*. 2007;40(3-4):261-271.
12. Wen M, Hawkey LC, Cacioppo JT. Objective and perceived neighborhood environment, individual SES and psychosocial factors, and self-rated health: An analysis of older adults in Cook County, Illinois. *Social science & medicine*. 2006;63(10):2575-2590.
13. White M, Kasl SV, Zahner GE, Will JC. Perceived crime in the neighborhood and mental health of women and children. *Environment and Behavior*. 1987;19(5):588-613.
14. Idler EL, Benyamini Y. Self-rated health and mortality: a review of twenty-seven community studies. *J Health Soc Behav*. Mar 1997;38(1):21-37.
15. Supreme Prosecutors' Office Republic Of Korea. *Analytical Report on Crimes (2008)*. 2009.
16. Curry A, Latkin C, Davey-Rothwell M. Pathways to depression: The impact of neighborhood violent crime on inner-city residents in Baltimore, Maryland, USA. *Social Science & Medicine*. 2008;67(1):23-30.
17. Sundquist K, Theobald H, Yang M, Li X, Johansson S-E, Sundquist J. Neighborhood violent crime and unemployment increase the risk of coronary heart disease: a multilevel study in an urban setting. *Social science & medicine*. 2006;62(8):2061-2071.
18. O'Campo P, Xue X, Wang M-C, Caughy M. Neighborhood risk factors for low birthweight in Baltimore: a multilevel analysis. *American Journal of Public Health*. 1997;87(7):1113-1118.
19. Warr M. Fear of victimization. *Public Perspective*. 1993;5:25-28.
20. Romer D, Jamieson KH, Aday S. Television news and the cultivation of fear of crime. *Journal of communication*. 2003;53(1):88-104.

- 1
  - 2
  - 3
  - 4
  - 5
  - 6
  - 7
  - 8
  - 9
  - 10
  - 11
  - 12
  - 13
  - 14
  - 15
  - 16
  - 17
  - 18
  - 19
  - 20
  - 21
  - 22
  - 23
  - 24
  - 25
  - 26
  - 27
  - 28
  - 29
  - 30
  - 31
  - 32
  - 33
  - 34
  - 35
  - 36
  - 37
  - 38
  - 39
  - 40
  - 41
  - 42
  - 43
  - 44
  - 45
  - 46
  - 47
  - 48
  - 49
  - 50
  - 51
  - 52
  - 53
  - 54
  - 55
  - 56
  - 57
  - 58
  - 59
  - 60
21. Lipschultz JH, Hilt ML. *Crime and local television news: Dramatic, breaking, and live from the scene*. Routledge; 2002.
22. Gerbner G. Cultivation analysis: An overview. *Mass Communication and Society*. 1998;1(3-4):175-194.
23. Meier RF, Short JF. CRIME AS HAZARD: PERCEPTIONS OF RISK AND SERIOUSNESS\*. *Criminology*. 1985;23(3):389-400.
24. Carpiano RM. Toward a neighborhood resource-based theory of social capital for health: Can Bourdieu and sociology help? *Social science & medicine*. 2006;62(1):165-175.
25. Rodrigues CD. Civil democracy, perceived risk, and insecurity in Brazil: An extension of the systemic social control model. *The Annals of the American Academy of Political and Social Science*. 2006;605(1):242-263.
26. Gibson CL, Zhao J, Lovrich NP, Gaffney MJ. Social integration, individual perceptions of collective efficacy, and fear of crime in three cities. *Justice Quarterly*. 2002;19(3):537-564.
27. Roman CG, Chalfin A. Fear of walking outdoors: a multilevel ecologic analysis of crime and disorder. *American journal of preventive medicine*. 2008;34(4):306-312.
28. Kim S-S, Chung Y, Perry MJ, Kawachi I, Subramanian S. Association between interpersonal trust, reciprocity, and depression in South Korea: A prospective analysis. *PloS one*. 2012;7(1):e30602.
29. Stockdale SE, Wells KB, Tang L, Belin TR, Zhang L, Sherbourne CD. The importance of social context: neighborhood stressors, stress-buffering mechanisms, and alcohol, drug, and mental health disorders. *Social Science & Medicine*. 2007;65(9):1867-1881.

**STROBE 2007 (v4) checklist of items to be included in reports of observational studies in epidemiology\***  
**Checklist for cohort, case-control, and cross-sectional studies (combined)**

| Section/Topic             | Item # | Recommendation                                                                                                                                                                                                                                                                                                                                                                                                                                                         | Reported on page # |
|---------------------------|--------|------------------------------------------------------------------------------------------------------------------------------------------------------------------------------------------------------------------------------------------------------------------------------------------------------------------------------------------------------------------------------------------------------------------------------------------------------------------------|--------------------|
| Title and abstract        | 1      | (a) Indicate the study’s design with a commonly used term in the title or the abstract                                                                                                                                                                                                                                                                                                                                                                                 | 3                  |
|                           |        | (b) Provide in the abstract an informative and balanced summary of what was done and what was found                                                                                                                                                                                                                                                                                                                                                                    | 3                  |
| <b>Introduction</b>       |        |                                                                                                                                                                                                                                                                                                                                                                                                                                                                        |                    |
| Background/rationale      | 2      | Explain the scientific background and rationale for the investigation being reported                                                                                                                                                                                                                                                                                                                                                                                   | 5-6                |
| Objectives                | 3      | State specific objectives, including any pre-specified hypotheses                                                                                                                                                                                                                                                                                                                                                                                                      | 6                  |
| <b>Methods</b>            |        |                                                                                                                                                                                                                                                                                                                                                                                                                                                                        |                    |
| Study design              | 4      | Present key elements of study design early in the paper                                                                                                                                                                                                                                                                                                                                                                                                                | 6-7                |
| Setting                   | 5      | Describe the setting, locations, and relevant dates, including periods of recruitment, exposure, follow-up, and data collection                                                                                                                                                                                                                                                                                                                                        | 6-7                |
| Participants              | 6      | (a) <i>Cohort study</i> —Give the eligibility criteria, and the sources and methods of selection of participants. Describe methods of follow-up<br><i>Case-control study</i> —Give the eligibility criteria, and the sources and methods of case ascertainment and control selection. Give the rationale for the choice of cases and controls<br><i>Cross-sectional study</i> —Give the eligibility criteria, and the sources and methods of selection of participants | 6-7                |
|                           |        | (b) <i>Cohort study</i> —For matched studies, give matching criteria and number of exposed and unexposed<br><i>Case-control study</i> —For matched studies, give matching criteria and the number of controls per case                                                                                                                                                                                                                                                 |                    |
| Variables                 | 7      | Clearly define all outcomes, exposures, predictors, potential confounders, and effect modifiers. Give diagnostic criteria, if applicable                                                                                                                                                                                                                                                                                                                               | 7-9                |
| Data sources/ measurement | 8*     | For each variable of interest, give sources of data and details of methods of assessment (measurement). Describe comparability of assessment methods if there is more than one group                                                                                                                                                                                                                                                                                   |                    |
| Bias                      | 9      | Describe any efforts to address potential sources of bias                                                                                                                                                                                                                                                                                                                                                                                                              | 7-9                |
| Study size                | 10     | Explain how the study size was arrived at                                                                                                                                                                                                                                                                                                                                                                                                                              | 7                  |
| Quantitative variables    | 11     | Explain how quantitative variables were handled in the analyses. If applicable, describe which groupings were chosen and why                                                                                                                                                                                                                                                                                                                                           | 7-9                |
| Statistical methods       | 12     | (a) Describe all statistical methods, including those used to control for confounding                                                                                                                                                                                                                                                                                                                                                                                  | 9                  |
|                           |        | (b) Describe any methods used to examine subgroups and interactions                                                                                                                                                                                                                                                                                                                                                                                                    | 9                  |
|                           |        | (c) Explain how missing data were addressed                                                                                                                                                                                                                                                                                                                                                                                                                            | 9                  |
|                           |        | (d) <i>Cohort study</i> —If applicable, explain how loss to follow-up was addressed<br><i>Case-control study</i> —If applicable, explain how matching of cases and controls was addressed                                                                                                                                                                                                                                                                              | 9                  |

|                          |     |                                                                                                                                                                                                                                                                                                                                                                                                               |       |
|--------------------------|-----|---------------------------------------------------------------------------------------------------------------------------------------------------------------------------------------------------------------------------------------------------------------------------------------------------------------------------------------------------------------------------------------------------------------|-------|
|                          |     | <i>Cross-sectional study</i> —If applicable, describe analytical methods taking account of sampling strategy                                                                                                                                                                                                                                                                                                  |       |
|                          |     | (e) Describe any sensitivity analyses                                                                                                                                                                                                                                                                                                                                                                         |       |
| <b>Results</b>           |     |                                                                                                                                                                                                                                                                                                                                                                                                               |       |
| Participants             | 13* | (a) Report numbers of individuals at each stage of study—eg numbers potentially eligible, examined for eligibility, confirmed eligible, included in the study, completing follow-up, and analysed<br>(b) Give reasons for non-participation at each stage<br>(c) Consider use of a flow diagram                                                                                                               | 10    |
| Descriptive data         | 14* | (a) Give characteristics of study participants (eg demographic, clinical, social) and information on exposures and potential confounders<br>(b) Indicate number of participants with missing data for each variable of interest<br>(c) <i>Cohort study</i> —Summarise follow-up time (eg, average and total amount)                                                                                           | 10    |
| Outcome data             | 15* | <i>Cohort study</i> —Report numbers of outcome events or summary measures over time<br><i>Case-control study</i> —Report numbers in each exposure category, or summary measures of exposure<br><i>Cross-sectional study</i> —Report numbers of outcome events or summary measures                                                                                                                             | 10    |
| Main results             | 16  | (a) Give unadjusted estimates and, if applicable, confounder-adjusted estimates and their precision (eg, 95% confidence interval). Make clear which confounders were adjusted for and why they were included<br>(b) Report category boundaries when continuous variables were categorized<br>(c) If relevant, consider translating estimates of relative risk into absolute risk for a meaningful time period | 10    |
| Other analyses           | 17  | Report other analyses done—eg analyses of subgroups and interactions, and sensitivity analyses                                                                                                                                                                                                                                                                                                                |       |
| <b>Discussion</b>        |     |                                                                                                                                                                                                                                                                                                                                                                                                               |       |
| Key results              | 18  | Summarise key results with reference to study objectives                                                                                                                                                                                                                                                                                                                                                      | 10-13 |
| Limitations              | 19  | Discuss limitations of the study, taking into account sources of potential bias or imprecision. Discuss both direction and magnitude of any potential bias                                                                                                                                                                                                                                                    | 13    |
| Interpretation           | 20  | Give a cautious overall interpretation of results considering objectives, limitations, multiplicity of analyses, results from similar studies, and other relevant evidence                                                                                                                                                                                                                                    | 13    |
| Generalisability         | 21  | Discuss the generalisability (external validity) of the study results                                                                                                                                                                                                                                                                                                                                         |       |
| <b>Other information</b> |     |                                                                                                                                                                                                                                                                                                                                                                                                               |       |
| Funding                  | 22  | Give the source of funding and the role of the funders for the present study and, if applicable, for the original study on which the present article is based                                                                                                                                                                                                                                                 | 17    |

\*Give information separately for cases and controls in case-control studies and, if applicable, for exposed and unexposed groups in cohort and cross-sectional studies.

**Note:** An Explanation and Elaboration article discusses each checklist item and gives methodological background and published examples of transparent reporting. The STROBE checklist is best used in conjunction with this article (freely available on the Web sites of PLoS Medicine at <http://www.plosmedicine.org/>, Annals of Internal Medicine at <http://www.annals.org/>, and Epidemiology at <http://www.epidem.com/>). Information on the STROBE Initiative is available at [www.strobe-statement.org](http://www.strobe-statement.org).

# BMJ Open

## Association between district-level safety and self-rated health: a multilevel study in an urban setting

|                                 |                                                                                                                                                                                                                                                                                                                                                                                                                                                                                                                                   |
|---------------------------------|-----------------------------------------------------------------------------------------------------------------------------------------------------------------------------------------------------------------------------------------------------------------------------------------------------------------------------------------------------------------------------------------------------------------------------------------------------------------------------------------------------------------------------------|
| Journal:                        | <i>BMJ Open</i>                                                                                                                                                                                                                                                                                                                                                                                                                                                                                                                   |
| Manuscript ID:                  | bmjopen-2013-004695.R2                                                                                                                                                                                                                                                                                                                                                                                                                                                                                                            |
| Article Type:                   | Research                                                                                                                                                                                                                                                                                                                                                                                                                                                                                                                          |
| Date Submitted by the Author:   | 24-Jun-2014                                                                                                                                                                                                                                                                                                                                                                                                                                                                                                                       |
| Complete List of Authors:       | Kim, Seung-Sup; Korea University, Department of Public Health Sciences<br>Choi, Jaesung; Sungkyunkwan University, Department of Economics<br>Park, Kisoo; Korea University, Department of Healthcare Management<br>Chung, Yeonseung; Korea Advanced Institute of Science and Technology,<br>Department of Mathematical Sciences<br>Park, Sangjo; Seoul National University, Department of Communication<br>Heo, Jongho; San Diego State University & University of California, San<br>Diego, Public Health Joint Doctoral Program |
| <b>Primary Subject Heading</b>: | Public health                                                                                                                                                                                                                                                                                                                                                                                                                                                                                                                     |
| Secondary Subject Heading:      | Epidemiology, Public health, Sociology                                                                                                                                                                                                                                                                                                                                                                                                                                                                                            |
| Keywords:                       | perceived neighborhood safety, self-rated health, neighborhood crime rate, Seoul Welfare Panel Study, multilevel analysis                                                                                                                                                                                                                                                                                                                                                                                                         |
|                                 |                                                                                                                                                                                                                                                                                                                                                                                                                                                                                                                                   |

SCHOLARONE™  
Manuscripts



1  
2  
3  
4  
5  
6 **Association between district-level safety and self-rated health:**  
7  
8 **a multilevel study in an urban setting**  
9  
10

11  
12  
13 Seung-Sup Kim MD, ScD, Jaesung Choi PhD, Kisoo Park PhD, Yeonseung Chung PhD, Sangjo  
14 Park BA, Jongho Heo\*  
15

16  
17 Seung-Sup Kim

18 Department of Public Health Sciences, Korea University, Seoul, Republic of Korea, Department  
19 of Social and Behavioral Sciences, Harvard School of Public Health, Boston, US, Department of  
20 Environmental and Occupational Health, The George Washington University School of Public  
21 Health and Health Services, Washington, DC, US  
22  
23

24  
25 Jaesung Choi

26 Department of Economics, Sungkyunkwan University, Seoul, Republic of Korea  
27

28  
29 Kisoo Park

30 Department of Healthcare Management, Korea University, Seoul, Republic of Korea  
31

32  
33 Yeonseung Chung

34 Department of Mathematical Sciences, Korea Advanced Institute of Science and Technology,  
35 Daejeon, Republic of Korea  
36

37  
38 Sangjo Park

39 Master's program, Department of Communication, Seoul National University, Seoul, Republic of  
40 Korea  
41

42  
43 Jongho Heo

44 Public Health Joint Doctoral Program, San Diego State University & University of California,  
45 San Diego, US  
46

47 Corresponding Author: Jongho Heo

48 Contact: +1-619-793-9738

49 Fax: +1-619-594-5888

50 E-mail: [joheo@ucsd.edu](mailto:joheo@ucsd.edu)

51 Public Health Joint Doctoral Program, San Diego State University & University of California,  
52 San Diego, 9245 Sky Park Court, Ste. 100s, San Diego, CA, 92123, USA  
53  
54  
55  
56  
57  
58  
59  
60

1  
2  
3  
4  
5  
6 Association between district-level safety and self-rated health:  
7  
8 a multilevel study in an urban setting  
9  
10

11  
12  
13 **Abstract**  
14

15  
16 **Objectives:** Several studies have reported the relationship between resident's perceived  
17 neighborhood safety and their health outcomes. However, those studies suffered from  
18 unreliability of neighborhood safety measure and potential residual confounding related to crime  
19 rates. In this study, using multilevel analysis to account for the hierarchical structure of the data,  
20 we examined associations between district-level safety and self-rated health after adjusting for  
21 potential confounders including district-level crime rate.  
22  
23

24  
25 **Design:** Cross-sectional study  
26

27  
28 **Setting:** We used the 1<sup>st</sup> wave of Seoul Welfare Panel Study, which has 7,761 individuals from  
29 3,665 households in 25 administrative districts in Seoul, South Korea. District-level safety was  
30 obtained by aggregating responses from the residents that are representative samples for each  
31 administrative district in Seoul. To examine an association between district-level safety and  
32 residents' self-rated health, we used mixed effects logistic regression.  
33

34  
35 **Results:** Our results showed that higher district-level perceived safety, an aggregated measure of  
36 district residents' responses on neighborhood safety, was significantly associated with poor self-  
37 rated health after controlling for sex, age, education level, job status, marital status, and  
38 household-level income (OR: 0.87, 95% CI: 0.78-0.97). Furthermore, this association was still  
39 robust when we additionally adjusted for district-level crime rate (OR: 0.86, 95% CI: 0.77-0.95).  
40  
41

42  
43 **Conclusions:** Our study highlights the importance of improving neighborhood perceived safety  
44 to enhance residents' health.  
45

46  
47  
48 **Keywords:** perceived neighborhood safety, self-rated health, neighborhood crime rate, Seoul  
49 Welfare Panel Study, multilevel analysis  
50  
51

### **Strengths and limitations of this study**

- Multilevel analytic frame was used to examine an association between district-level safety and residents' self-rated health using representative samples of metropolis, Seoul, South Korea.
- We succeed in adjusting for potential confounders such as district-level crime rate in our analytic model, which past studies have failed.
- Causal relationships cannot be inferred from the cross-sectional data of this study.

## INTRODUCTION

Crime is one of the major problems in many metropolitan areas across countries. Although city crime rates have dropped globally since the mid-1990s,<sup>1</sup> there are still large variations and dramatic fluctuations across cities.<sup>2</sup> Past criminological studies revealed that variations in crime rates were explained by characteristics of metropolitan areas, such as population sizes, ethnic heterogeneity, geographic mobility, economic segregation, unemployment rate, poverty level and degree of social integration and control.<sup>2-4</sup> Thus, many governments have made great efforts to reduce the crime rates especially in metropolitan areas by intervening in those characteristics to ensure the safety of their residents.

Safety from crime is not only an essential human need in daily life, but also a prerequisite to human health.<sup>5</sup> A body of past studies has reported the relationship between residents' perceptions of neighborhood safety and their health outcomes.<sup>6,7</sup> For example, one UK survey with 407 adults reported that fear of crime was significantly associated with self-rated health and mental well-being.<sup>8</sup> Ziersch and Baum<sup>10</sup> showed that perceived neighborhood safety was related to physical and mental health among 2,400 residents in western suburbs of Adelaide, Australia.

However, these earlier studies suffer from the following limitations. First, most of the previous studies used individual-level neighborhood perceived safety as an exposure variable, which could be influenced by several factors such as prior individual experience of victimization or individual health conditions other than neighborhood-level safety.<sup>11,12</sup> This could be particularly a critical issue in previous cross-sectional studies because of the potential reverse causation, meaning that the sick are more likely to perceive their neighborhood as unsafe.<sup>7,13</sup> The second limitation is lack of representativeness of samples within the operationalized definition of

1  
2  
3 neighborhood. Few studies had enough sample size or the sample size within neighborhood to be  
4  
5 representative for each neighborhood.<sup>6,8,14</sup> Unless the responses are obtained from a  
6  
7 representative sample of participants within each neighborhood, aggregated perceived  
8  
9 neighborhood measures can potentially be prone to measurement errors. The final limitation is  
10  
11 that previous studies did not adjust for district-level crime rate as a potential confounder although  
12  
13 crime-rate has been reported to influence perception of neighborhood safety as well as residents'  
14  
15 health outcomes.  
16  
17  
18  
19

20  
21 In this study, we assessed the district-level safety, which was obtained by aggregating responses  
22  
23 from the residents that are representative samples for each administrative district in Seoul, the  
24  
25 capital of South Korea. Then, using multilevel analysis to account for the hierarchical structure  
26  
27 of the data, we examined the association between district-level perceived safety and self-rated  
28  
29 health after adjusting for potential confounders including district-level crime rate.  
30  
31  
32  
33  
34

## 35 36 **METHODS**

### 37 38 **Study population**

39  
40  
41 Data were obtained from the Seoul Welfare Panel Study (SWPS), which tracked a representative  
42  
43 sample of households residing in 25 administrative districts in Seoul, South Korea. The SWPS  
44  
45 was launched in 2008 by the Seoul Welfare Foundation. The 1<sup>st</sup> wave of the survey was  
46  
47 conducted in 2008 and its supplementary survey targeting the low-income households was  
48  
49 implemented in 2009. The SWPS was suspended after the 2nd wave of the survey was conducted  
50  
51 in 2010 September. The survey employed a two-stage stratified cluster sampling approach where  
52  
53 a representative sample of census tracts for each district was first drawn, and then households  
54  
55  
56  
57  
58  
59  
60

1  
2  
3 were randomly selected within those sampled census tracts at baseline. A household  
4  
5 representative answered household survey and all members of a household whose age is 15 or  
6  
7 older were interviewed. A total of 7,761 individuals completed the interviews in Wave 1. The  
8  
9 SWPS have been publicly released [<http://panel.welfare.seoul.kr>]. Because all respondents  
10  
11 answered on questionnaire items we used in this study, we were able to conduct our analyses  
12  
13 based on the entire sample participated in the first wave of SWPS without listwise deletion or  
14  
15 missing value imputation for handling missing data. The final sample used in the data analysis of  
16  
17 this research consists of 7,761 individuals from 3,665 households from 25 administrative districts  
18  
19 in Seoul. The number of households in each district was 146.6 on average, ranging from 108 to  
20  
21 198. This research received IRB exemption from Division of Research Affairs at the San Diego  
22  
23 State University.  
24  
25  
26  
27  
28  
29

### 30 **Exposure: district-level perceived safety**

31  
32  
33 District-level perceived safety was assessed through the household survey using a question about  
34  
35 how much a household representative agrees with the following statement: ‘My current  
36  
37 residential environment is unsafe’. Respondents answered in a five level ordinal scale from  
38  
39 “strongly agree” (coded as 1) to “strongly disagree” (coded as 5). The answer was then  
40  
41 dichotomized into “unsafe” (coded as 0) for the response, 1-2 and “safe” (coded as 1) for the  
42  
43 response, 3-5. The binary responses from household representatives were aggregated to calculate  
44  
45 an administrative district-level perceived neighborhood safety by taking a weighted average of  
46  
47 household-specific perceived safety within each district with the household size used as weight.  
48  
49 Such aggregation results in that the district-level perceived neighborhood safety is essentially  
50  
51 sample proportion of individuals who answered “safe” within each district.  
52  
53  
54  
55  
56  
57  
58  
59  
60

### **Outcome: poor self-rated health**

Poor self-rated health was assessed through the individual interview using the question “How would you rate your overall health?” This question is on the ordinal level, ranging from “very good” (coded as 1) to “very poor” (coded as 5). The response was then dichotomized into “good health” (coded as 0) for response, 1-3 and “poor health” (coded as 1) for response, 4-5. Although self-rated health cannot assess multi-dimensional aspects of health conditions, it is known to be a reliable predictor of life-expectancy after adjusting for other health indicators.<sup>15</sup>

### **Covariates**

We included several confounders in the data analysis. For individual-level confounders, we have sex, age group (15-19, 20-29, 30-39, 40-49, 50-59, 60-69, and 70 or more), education level (elementary or less, junior high school, high school, college graduate, university graduate, and graduate school or more), marital status (married or cohabiting vs. others), and job status (employed vs. unemployed), household income with six categories (1,000,000 KRW or less; 1,010,000-2,000,000 KRW; 2,010,000-3,000,000 KRW; 3,010,000-4,000,000 KRW; 4,010,000-5,000,000 KRW; and Above 5,000,000 KRW), and individual-perception of district safety (unsafe vs. safe). Because neighborhood safety was assessed solely from the household survey, we assigned the value of perceived neighborhood safety measured from each household representative to all members of the household.

We considered district-level crime rate as a potential covariate at district-level because it can influence residents’ health as well as perceived safety. District-level crime rates for each of 25 administrative district (‘Gu’) in Seoul were collected from the ‘Analytical report on crimes,

1  
2  
3 2008' that is annually published by supreme prosecutors' office in South Korea.<sup>16</sup> District-level  
4  
5 crime rate was calculated by dividing the total number of crimes by the total number of residents  
6  
7 in each district (expressed in number/year/1,000 persons). Using an administrative district  
8  
9 identifier in the SWPS, we linked the official crime rate of each administrative district to our  
10  
11 final dataset of the SWPS.  
12

### 13 14 15 16 **Data analysis**

17  
18 Mixed effect logistic regression was used to investigate the association between district-level  
19  
20 safety and self-rated health. Because of the hierarchical structure in our data (i.e., individuals are  
21  
22 nested in households, which in turn are nested in districts), within-household and within-district  
23  
24 correlations were incorporated using household-specific and district-specific random intercepts.  
25  
26 We made stepwise adjustments of potential confounders in the data analysis. First, we adjusted  
27  
28 for potential confounders including sex, age, education level, job status, marital status, and  
29  
30 household-level income. Second, we additionally adjusted for district-level crime rate. Finally,  
31  
32 we examined the association after adjusting for individual perception of district safety in addition  
33  
34 to all of the previously mentioned confounders. All of the confounders were included as  
35  
36 categorical variables, and the district-level perceived safety was included after standardization  
37  
38 for simple interpretation in the model. All computations were done using R statistical software.  
39  
40  
41  
42  
43  
44  
45  
46  
47

## 48 **RESULTS**

49  
50  
51 Table 1 presents the distribution of the study population and the prevalence of poor self-rated  
52  
53 health by each of the individual-level, household-level, and district-level characteristics. Overall,  
54  
55 poor self-rated health was reported at 20.9% (1,620 out of 7,761 participants). The proportion  
56  
57



1  
2  
3 was higher for women and showed an increasing pattern with age. Lower proportions were  
4  
5 observed for participants in lower education levels. The unemployed and people living in an  
6  
7 unsafe neighborhood exhibited higher prevalence of poor self-rated health compared to the  
8  
9 employed and those living in a safe neighborhood. Household income were fairly equally  
10  
11 distributed in the SWPS. As to the district-level perceived safety and crime rate, given the  
12  
13 overall mean of each variable, relative size of each standard deviation shows that there were  
14  
15 considerable variations among the 25 districts.  
16  
17  
18  
19

20  
21 District-level perceived safety was significantly associated with poor self-rated health while  
22  
23 different sets of confounders being step-wisely adjusted (Table 2). Living in a district where its  
24  
25 safety level is 1 standard deviation (0.08) higher resulted in 13% lower odds of reporting self-  
26  
27 rated poor health status (OR: 0.87, 95% CI: 0.78, 0.97) after adjusting for sex, age, education  
28  
29 level, job status, marital status, and household-level income. When additionally adjusted for  
30  
31 district-level crime rate, this association was slightly attenuated but still significant (OR: 0.86,  
32  
33 95% CI: 0.77, 0.95). When we adjusted for individual perception of district safety in addition to  
34  
35 previously mentioned potential confounders, the magnitude of this association was remained  
36  
37 significant (OR: 0.86, 95% CI: 0.77, 0.96).  
38  
39  
40  
41  
42  
43

## 44 **DISCUSSION**

45  
46 Evidence from our study indicated that district-level perceived safety, which was assessed by  
47  
48 aggregating responses from residents in each district, was significantly associated with poor self-  
49  
50 rated health even after controlling for demographic information, SES, and district-level crime  
51  
52 rate. Notably, this association was still robust when we additionally adjusted for individual  
53  
54 perception of district safety.  
55  
56  
57  
58  
59  
60

1  
2  
3 Our findings are in line with previous research that showed associations between perceived  
4 neighborhood safety and health outcomes. Past studies have also reported that residents who  
5 perceived that their neighborhood had more severe problems were more likely to experience  
6 greater anxiety, stress, and depression.<sup>6,17</sup> The studies sampled women, children, and the elderly  
7 also provided consistent evidence of a relationship between perceived crime risk and physical  
8 health.<sup>7,14</sup>

9  
10  
11 In this study, district-level crime rate was not associated with self-rated health in the fully  
12 adjusted model. Furthermore, our post-hoc analysis showed that there was no statistically  
13 significant relationship between district crime rate and residents' self-rated health regardless of  
14 adjustment of confounders, although district-level crime rate could be a major influence on  
15 district-level safety. This finding is different from past studies that reported a significant  
16 relationship between district crime rate and residents' health such as coronary heart disease<sup>18</sup> and  
17 low birth weight.<sup>19</sup>

18  
19  
20 The differential association between district-level perceived safety and crime rate in relation to  
21 self-rated health could be explained in three ways. First, mass media may increase individual-  
22 level perceived neighborhood insecurity regardless of their neighborhood crime rates, especially  
23 when they reported the crime in ways of exaggeration.<sup>20,21</sup> The mass media tend to emphasize  
24 criminal stories which can draw attention from audience.<sup>22</sup> Previous studies called this  
25 phenomenon as "cultivation effect" meaning that exposure to the world of television cultivates  
26 exaggerated perceptions of viewers and magnifies viewers' fear about crime.<sup>23</sup> The residents who  
27 watched news about neighborhood crimes are more likely to perceive their neighborhood more  
28 vulnerable regions to crime regardless of regional crime rate.<sup>21</sup>

1  
2  
3  
4  
5  
6  
7  
8  
9  
10  
11  
12  
13  
14  
15  
16  
17  
18  
19  
20  
21  
22  
23  
24  
25  
26  
27  
28  
29  
30  
31  
32  
33  
34  
35  
36  
37  
38  
39  
40  
41  
42  
43  
44  
45  
46  
47  
48  
49  
50  
51  
52  
53  
54  
55  
56  
57  
58  
59  
60

Second, different types of crime would have different effects on the perceived risk or fear of crime. For example, murder, rape, and personal theft may have higher effects on the fear of crime than larceny and auto-theft. Hence, total crime rate that was used in this research might not be sophisticated enough to capture the association between the prevalence of crime in the district and the residents' health condition.<sup>24</sup> However, when we conducted a post-hoc analysis using a different measure, '5 index crime rate', which includes major five serious crimes (i.e. murder, robbery, rape, assault and theft) that has been adopted by Korean police to indicate violent crime rate, still we could not find association with residents' self-rated health.

Finally, if social and physical resources of neighborhood are deteriorated or deprived, residents tend to perceive neighborhood safety more irrespective of the objective neighborhood crime rate.<sup>25</sup> The poor quality of social and physical environment, such as dilapidated houses or having no formal or informal neighborhood networks, may work as a trigger to make residents perceive their neighborhood dangerous.<sup>26,27</sup>

There could be several pathways linking district-level perceived neighborhood safety to resident's self-rated health. First, higher district-level perceived safety can cause less outdoor physical activities<sup>7,28</sup> leading to poor health. Second, elevated district-level perceived safety may aggravates social supports or deteriorates physical environments, in turn, it may harm mental and physical outcomes.<sup>29</sup> Last, elevated district-level perceived safety may be a latent stressor causing chronic stress status that could undermine residents' mental health.<sup>30</sup>

Our study has several limitations. First, potential reverse causation is of concern due to its cross-sectional study design, implying that people with poor-self rated health are more likely to perceive their neighborhood as unsafe. Future studies are required to examine the causal

1  
2  
3 association between district-level perceived safety and health outcomes. Second, this study  
4  
5 assessed perceived neighborhood safety through a single-item measure. This item may not reflect  
6  
7 multi-dimensional aspects of the neighborhood safety.  
8  
9

10  
11 Despite these limitations, our study has the strength in that we used representative samples for  
12  
13 each operationalized administrative district, which enabled multilevel analysis using a district-  
14  
15 level aggregate measure of perceived safety whereas most of the previous studies used individual  
16  
17 reporting of perceived safety as an exposure variable. Furthermore, to our knowledge, this is one  
18  
19 of the first studies to examine the association between district-level perceived neighborhood  
20  
21 safety and health outcome after adjusting for district-level crime rate.  
22  
23  
24

25  
26 In sum, our study showed that district-level perceived safety was associated with residents' poor  
27  
28 self-rated health even after controlling for demographic influences, SES, and district-level crime  
29  
30 rate. Our study results evoke the importance of local authorities (or governments) to make efforts  
31  
32 toward improving neighborhood perceived safety to enhance residents' health.  
33  
34  
35  
36  
37  
38  
39  
40  
41  
42  
43  
44  
45  
46  
47  
48  
49  
50  
51  
52  
53  
54  
55  
56  
57  
58  
59  
60

Table 1. Descriptive statistics for the independent variables and their associations with self-rated poor health (N=7761)

| Variables                                                      | Total       | Prevalence of poor self-rated health |              |
|----------------------------------------------------------------|-------------|--------------------------------------|--------------|
|                                                                | N           | N (%)                                | p-values     |
| <i>Individual level variables (N=7,761)</i>                    |             |                                      |              |
| <b>Sex</b>                                                     |             |                                      | <0.0001      |
| Male                                                           | 3,547       | 599 (16.9)                           |              |
| Female                                                         | 4,214       | 1,021 (24.2)                         |              |
| <b>Age (years)</b>                                             |             |                                      | <0.0001      |
| 15-19                                                          | 536         | 17 (3.2)                             |              |
| 20-29                                                          | 973         | 26 (2.7)                             |              |
| 30-39                                                          | 1,577       | 92 (5.8)                             |              |
| 40-49                                                          | 1,425       | 185 (13.0)                           |              |
| 50-59                                                          | 1,139       | 242 (21.2)                           |              |
| 60-69                                                          | 1,130       | 482 (42.7)                           |              |
| 70 or more                                                     | 981         | 576 (58.7)                           |              |
| <b>Job Status</b>                                              |             |                                      | <0.0001      |
| Employed                                                       | 3,199       | 293 (9.2)                            |              |
| Unemployed                                                     | 4,562       | 1,327 (29.1)                         |              |
| <b>Education Level</b>                                         |             |                                      | <0.0001      |
| Elementary school or less                                      | 1,143       | 664 (58.1)                           |              |
| Middle school                                                  | 703         | 271 (38.5)                           |              |
| High school                                                    | 2,483       | 433 (17.4)                           |              |
| College graduate                                               | 572         | 46 (8.0)                             |              |
| University graduate                                            | 2,516       | 185 (7.4)                            |              |
| Graduate school or more                                        | 344         | 21 (6.1)                             |              |
| <b>Marital status</b>                                          |             |                                      | 0.151        |
| Married/cohabiting                                             | 5,059       | 1,031 (20.4)                         |              |
| Others                                                         | 2,702       | 589 (21.8)                           |              |
| <b>Individual-level safety</b>                                 |             |                                      | <0.0001      |
| Safe                                                           | 6,777       | 1,361 (20.1)                         |              |
| Unsafe                                                         | 984         | 259 (26.3)                           |              |
| <i>Household level variables (N=3,665)</i>                     |             |                                      |              |
| <b>Household Income</b>                                        |             |                                      |              |
| 1,000,000 KRW or less                                          | 770         |                                      |              |
| 1,010,000-2,000,000 KRW                                        | 772         |                                      |              |
| 2,010,000-3,000,000 KRW                                        | 656         |                                      |              |
| 3,010,000-4,000,000 KRW                                        | 510         |                                      |              |
| 4,010,000-5,000,000 KRW                                        | 345         |                                      |              |
| Above 5,000,000 KRW                                            | 612         |                                      |              |
| <i>District level variables (N=25)</i>                         |             |                                      |              |
|                                                                | <u>Mean</u> | <u>S.D.</u>                          | <u>Range</u> |
| <b>District-level perceived safety (mean (SD))<sup>a</sup></b> | 0.87        | 0.08                                 | 0.68-0.98    |
| <b>District-level crime rate (mean (SD))<sup>b</sup></b>       | 4.63        | 2.94                                 | 2.25-16.31   |

1  
2  
3     <sup>a</sup> District-specific average of individual-level safety  
4

5     <sup>b</sup> Expressed in number/year/1,000 persons  
6  
7  
8  
9  
10  
11  
12  
13  
14  
15  
16  
17  
18  
19  
20  
21  
22  
23  
24  
25  
26  
27  
28  
29  
30  
31  
32  
33  
34  
35  
36  
37  
38  
39  
40  
41  
42  
43  
44  
45  
46  
47  
48  
49  
50  
51  
52  
53  
54  
55  
56  
57  
58  
59  
60

For peer review only

1  
2  
3  
4  
5  
6  
7  
8  
9  
10  
11  
12  
13  
14  
15  
16  
17  
18  
19  
20  
21  
22  
23  
24  
25  
26  
27  
28  
29  
30  
31  
32  
33  
34  
35  
36  
37  
38  
39  
40  
41  
42  
43  
44  
45  
46  
47  
48  
49

Table 2. Associations between district-level perceived safety and poor self-rated health

|                                              | Unadjusted |              | Adjusted <sup>a</sup> |              |        |              |        |              |
|----------------------------------------------|------------|--------------|-----------------------|--------------|--------|--------------|--------|--------------|
|                                              | OR         | 95% CI       | OR                    | 95% CI       | OR     | 95% CI       | OR     | 95% CI       |
| District-level perceived safety <sup>b</sup> | 0.83***    | (0.76, 0.91) | 0.87*                 | (0.78, 0.97) | 0.86** | (0.77, 0.95) | 0.86** | (0.77, 0.96) |
| District-level crime rate                    |            |              |                       |              | 0.97   | (0.93, 1.01) | 0.97   | (0.93,1.01)  |
| Individual perception of district safety     |            |              |                       |              |        |              | 0.82   | (0.65,1.04)  |

<sup>a</sup> Adjusted for sex, age, education level, job status, marital status, and household-level income

<sup>b</sup> Aggregated responses about neighborhood safety among residents in the same district. The variables was included in the data analysis after standardization

\* p-value<0.05, \*\* p-value<0.01

1  
2  
3 Acknowledgments: None  
4

5 Competing interests: None  
6

7  
8 This research received no specific grant from any funding agency in the public, commercial or  
9 not-for-profit sectors.  
10

11 Contributorship Statement: SSK coordinated the design, analysis and writing the manuscript. JC,  
12 KP, YC, SP, JH participated in the design, analysis and in preparing the manuscript. All of the  
13 authors contributed to read, edited and approved of the final draft of the manuscript.  
14

15  
16 Data Sharing Statement: No additional data available  
17  
18  
19  
20  
21  
22  
23  
24  
25  
26  
27  
28  
29  
30  
31  
32  
33  
34  
35  
36  
37  
38  
39  
40  
41  
42  
43  
44  
45  
46  
47  
48  
49  
50  
51  
52  
53  
54  
55  
56  
57  
58  
59  
60



## REFERENCES

1. Tseloni A, Mailley J, Farrell G, et al. Exploring the international decline in crime rates. *European Journal of Criminology*. 2010;7(5):375-394.
2. McCall PL, Land KC, Parker KF. Heterogeneity in the rise and decline of city-level homicide rates, 1976–2005: A latent trajectory analysis. *Social Science Research*. 2011;40(1):363-378.
3. Sampson RJ, Raudenbush SW, Earls F. Neighborhoods and violent crime: A multilevel study of collective efficacy. *Science*. 1997;277(5328):918-924.
4. Patterson EB. Poverty, income inequality, and community crime rates. *Criminology*. 1991;29(4):755-776.
5. Krug EG, Mercy JA, Dahlberg LL, et al. The world report on violence and health. *The lancet*. 2002;360(9339):1083-1088.
6. Gary TL, Stark SA, LaVeist TA. Neighborhood characteristics and mental health among African Americans and whites living in a racially integrated urban community. *Health & Place*. 2007;13(2):569-575.
7. Tucker-Seeley RD, Subramanian S, Li Y, et al. Neighborhood safety, socioeconomic status, and physical activity in older adults. *American journal of preventive medicine*. 2009;37(3):207-213.
8. Green G, Gilbertson JM, Grimsley MF. Fear of crime and health in residential tower blocks A case study in Liverpool, UK. *The European Journal of Public Health*. 2002;12(1):10-15.
9. Latkin CA, Curry AD. Stressful neighborhoods and depression: a prospective study of the impact of neighborhood disorder. *Journal of health and social behavior*. 2003:34-44.
10. Ziersch AM, Baum FE, MacDougall C, et al. Neighbourhood life and social capital: the implications for health. *Social science & medicine*. 2005;60(1):71-86.
11. Raudenbush SW. *Hierarchical linear models: Applications and data analysis methods*. Vol 1: Sage; 2002.
12. Kruger DJ, Reischl TM, Gee GC. Neighborhood social conditions mediate the association between physical deterioration and mental health. *American journal of community psychology*. 2007;40(3-4):261-271.
13. Wen M, Hawkey LC, Cacioppo JT. Objective and perceived neighborhood environment, individual SES and psychosocial factors, and self-rated health: An analysis of older adults in Cook County, Illinois. *Social science & medicine*. 2006;63(10):2575-2590.
14. White M, Kasl SV, Zahner GE, et al. Perceived crime in the neighborhood and mental health of women and children. *Environment and Behavior*. 1987;19(5):588-613.
15. Idler EL, Benyamini Y. Self-rated health and mortality: a review of twenty-seven community studies. *J Health Soc Behav*. Mar 1997;38(1):21-37.
16. Supreme Prosecutors' Office Republic of Korea. *Analytical Report on Crimes (2008)*. 2009.
17. Curry A, Latkin C, Davey-Rothwell M. Pathways to depression: The impact of neighborhood violent crime on inner-city residents in Baltimore, Maryland, USA. *Social Science & Medicine*. 2008;67(1):23-30.
18. Sundquist K, Theobald H, Yang M, et al. Neighborhood violent crime and unemployment increase the risk of coronary heart disease: a multilevel study in an urban setting. *Social science & medicine*. 2006;62(8):2061-2071.
19. O'Campo P, Xue X, Wang M-C, et al. Neighborhood risk factors for low birthweight in Baltimore: a multilevel analysis. *American Journal of Public Health*. 1997;87(7):1113-1118.
20. Warr M. Fear of victimization. *Public Perspective*. 1993;5:25-28.
21. Romer D, Jamieson KH, Aday S. Television news and the cultivation of fear of crime. *Journal of communication*. 2003;53(1):88-104.
22. Lipschultz JH, Hilt ML. *Crime and local television news: Dramatic, breaking, and live from the scene*. Routledge; 2002.

- 1
  - 2
  - 3
  - 4
  - 5
  - 6
  - 7
  - 8
  - 9
  - 10
  - 11
  - 12
  - 13
  - 14
  - 15
  - 16
  - 17
  - 18
  - 19
  - 20
  - 21
  - 22
  - 23
  - 24
  - 25
  - 26
  - 27
  - 28
  - 29
  - 30
  - 31
  - 32
  - 33
  - 34
  - 35
  - 36
  - 37
  - 38
  - 39
  - 40
  - 41
  - 42
  - 43
  - 44
  - 45
  - 46
  - 47
  - 48
  - 49
  - 50
  - 51
  - 52
  - 53
  - 54
  - 55
  - 56
  - 57
  - 58
  - 59
  - 60
23. Gerbner G. Cultivation analysis: An overview. *Mass Communication and Society*. 1998;1(3-4):175-194.
24. Meier RF, Short JF. CRIME AS HAZARD: PERCEPTIONS OF RISK AND SERIOUSNESS\*. *Criminology*. 1985;23(3):389-400.
25. Carpiano RM. Toward a neighborhood resource-based theory of social capital for health: Can Bourdieu and sociology help? *Social science & medicine*. 2006;62(1):165-175.
26. Rodrigues CD. Civil democracy, perceived risk, and insecurity in Brazil: An extension of the systemic social control model. *The Annals of the American Academy of Political and Social Science*. 2006;605(1):242-263.
27. Gibson CL, Zhao J, Lovrich NP, et al. Social integration, individual perceptions of collective efficacy, and fear of crime in three cities. *Justice Quarterly*. 2002;19(3):537-564.
28. Roman CG, Chalfin A. Fear of walking outdoors: a multilevel ecologic analysis of crime and disorder. *American journal of preventive medicine*. 2008;34(4):306-312.
29. Kim S-S, Chung Y, Perry MJ, et al. Association between interpersonal trust, reciprocity, and depression in South Korea: A prospective analysis. *PloS one*. 2012;7(1):e30602.
30. Stockdale SE, Wells KB, Tang L, et al. The importance of social context: neighborhood stressors, stress-buffering mechanisms, and alcohol, drug, and mental health disorders. *Social Science & Medicine*. 2007;65(9):1867-1881.

1  
2  
3 Jongho Heo, MPH, Doctoral student  
4 Public Health Joint Doctoral Program,  
5 San Diego State University & University of California, San Diego 9245  
6 Sky Park Court, Ste. 100, San Diego, CA 92123  
7 Phone: (619) 793-9738  
8 E-mail: joheo@ucsd.edu; jjongho77@gmail.com  
9

10  
11 Editor-in-Chief  
12 BMJ open  
13

14  
15  
16  
17  
18 **Dear Editor-in-Chief in the BMJ open**  
19

20 | This is the 2nd revision of our manuscript, “Association between district-level safety and self-  
21 rated health: a multilevel study in an urban setting”. We really appreciate that the reviewer  
22 provided precious comments on how to improve the manuscript.  
23  
24  
25  
26  
27

28 Sincerely yours,  
29 Jongho Heo on behalf of co-authors  
30  
31  
32  
33  
34  
35  
36  
37  
38  
39  
40  
41  
42  
43  
44  
45  
46  
47  
48  
49  
50  
51  
52  
53  
54  
55  
56  
57  
58  
59  
60

1  
2  
3  
4  
5  
6  
7  
8  
9  
10  
11  
12  
13  
14  
15  
16  
17  
18  
19  
20  
21  
22  
23  
24  
25  
26  
27  
28  
29  
30  
31  
32  
33  
34  
35  
36  
37  
38  
39  
40  
41  
42  
43  
44  
45  
46  
47  
48  
49  
50  
51  
52  
53  
54  
55  
56  
57  
58  
59  
60

## Association between district-level safety and self-rated health: a multilevel study in an urban setting

Seung-Sup Kim MD, ScD, Jaesung Choi PhD, Kisoo Park PhD, Yeonseung Chung PhD, Sangjo Park BA, Jongho Heo\*

Seung-Sup Kim

Department of Public Health Sciences, Korea University, Seoul, Republic of Korea, Department of Social and Behavioral Sciences, Harvard School of Public Health, Boston, US, Department of Environmental and Occupational Health, The George Washington University School of Public Health and Health Services, Washington, DC, US

Jaesung Choi

Department of Economics, Sungkyunkwan University, Seoul, Republic of Korea

Kisoo Park

Department of Healthcare Management, Korea University, Seoul, Republic of Korea

Yeonseung Chung

Department of Mathematical Sciences, Korea Advanced Institute of Science and Technology, Daejeon, Republic of Korea

Sangjo Park

Master's program, Department of Communication, Seoul National University, Seoul, Republic of Korea

Jongho Heo

Public Health Joint Doctoral Program, San Diego State University & University of California, San Diego, US

Corresponding Author: Jongho Heo

Contact: +1-619-793-9738

Fax: +1-619-594-5888

E-mail: [joheo@ucsd.edu](mailto:joheo@ucsd.edu)

Public Health Joint Doctoral Program, San Diego State University & University of California, San Diego, 9245 Sky Park Court, Ste. 100s, San Diego, CA, 92123, USA

1  
2  
3  
4 Association between district-level safety and self-rated health:  
5  
6 a multilevel study in an urban setting  
7  
8  
9

10  
11 **Abstract**  
12

13 **Objectives:** Several studies have reported the relationship between resident's perceived  
14 neighborhood safety and their health outcomes. However, those studies suffered from  
15 unreliability of neighborhood safety measure and potential residual confounding related to crime  
16 rates. In this study, using multilevel analysis to account for the hierarchical structure of the data,  
17 we examined associations between district-level safety and self-rated health after adjusting for  
18 potential confounders including ~~individual-level perceived neighborhood safety and~~ district-level  
19 crime rate.  
20  
21  
22

23  
24 **Design:** Cross-sectional study  
25

26 **Setting:** We used the 1<sup>st</sup> wave of Seoul Welfare Panel Study, which has 7,761 individuals from  
27 3,665 households in 25 administrative districts in Seoul, South Korea. District-level safety was  
28 obtained by aggregating responses from the residents that are representative samples for each  
29 administrative district in Seoul. To examine an association between district-level safety and  
30 residents' self-rated health, we used mixed effects logistic regression.  
31  
32

33  
34 **Results:** Our results showed that higher district-level perceived safety, an aggregated measure of  
35 district residents' responses on neighborhood safety, was significantly associated with poor self-  
36 rated health after controlling for sex, age, education level, job status, marital status, and  
37 household-level income demographic influences and SES (OR: 0.87, 95% CI: 0.78-0.97).  
38 Notably Furthermore, this association was still robust even when we additionally adjusted for  
39 district-level crime rate and individual-level perceived neighborhood safety district-level crime  
40 rate (OR: 0.86, 95% CI: 0.77-0.95). ~~(OR: 0.86, 95% CI: 0.77-0.96).~~  
41  
42  
43

44 **Conclusions:** Our study highlights the importance of improving neighborhood perceived safety  
45 to enhance residents' health.  
46  
47  
48  
49  
50

51  
52 **Keywords:** perceived neighborhood safety, self-rated health, neighborhood crime rate, Seoul  
53 Welfare Panel Study, multilevel analysis  
54  
55

### **Strengths and limitations of this study**

- Multilevel analytic frame was used to examine an association between district-level safety and residents' self-rated health using representative samples of metropolis, Seoul, South Korea.
- We succeed in adjusting for potential confounders such as [district-level crime rate](#) ~~individual-level perceived neighborhood safety and district-level crime rate~~ in our analytic model, which past studies have failed.
- Causal relationships cannot be inferred from the cross-sectional data [of this study.](#) -

## INTRODUCTION

Crime is one of the major problems in many metropolitan areas across countries. Although city crime rates have dropped globally since the mid-1990s,<sup>1</sup> there are still large variations and dramatic fluctuations across cities.<sup>2</sup> Past criminological studies revealed that variations in crime rates were explained by characteristics of metropolitan areas, such as population sizes, ethnic heterogeneity, geographic mobility, economic segregation, unemployment rate, poverty level and degree of social integration and control.<sup>2-4</sup> Thus, many governments have made great efforts to reduce the crime rates especially in metropolitan areas by intervening in those characteristics to ensure the safety of their residents.

Safety from crime is not only an essential human need in daily life, but also a prerequisite to human health.<sup>5</sup> A body of past studies has reported the relationship between residents' perceptions of neighborhood safety and their health outcomes.<sup>6,7</sup> For example, one UK survey with 407 adults reported that fear of crime was significantly associated with self-rated health and mental well-being.<sup>8</sup> Ziersch and Baum<sup>10</sup> showed that perceived neighborhood safety was related to physical and mental health among 2,400 residents in western suburbs of Adelaide, Australia.

However, these earlier studies suffer from the following limitations. First, most of the previous studies used individual-level neighborhood perceived safety as an exposure variable, which could be influenced by several factors such as prior individual experience of victimization or individual health conditions other than neighborhood-level safety.<sup>11,12</sup> This could be particularly a critical issue in previous cross-sectional studies because of the potential reverse causation, meaning that the sick are more likely to perceive their neighborhood as unsafe.<sup>7,13</sup> The second limitation is lack of representativeness of samples within the operationalized definition of

1  
2  
3 neighborhood. Few studies had enough sample size or the sample size within neighborhood to be  
4  
5 representative for each neighborhood.<sup>6,8,14</sup> Unless the responses are obtained from a  
6  
7 representative sample of participants within each neighborhood, aggregated perceived  
8  
9 neighborhood measures can potentially be prone to measurement errors. The final limitation is  
10  
11 that previous studies did not adjust for district-level crime rate as a potential confounder although  
12  
13 crime-rate has been reported to influence perception of neighborhood safety as well as residents'  
14  
15 health outcomes.  
16  
17  
18  
19

20  
21 In this study, we assessed the district-level safety, which was obtained by aggregating responses  
22  
23 from the residents that are representative samples for each administrative district in Seoul, the  
24  
25 capital of South Korea. Then, using multilevel analysis to account for the hierarchical structure  
26  
27 of the data, we examined [the](#) associations between district-level [perceived](#) safety and self-rated  
28  
29 health after adjusting for potential confounders including ~~individual-level perceived~~  
30  
31 ~~neighborhood safety and~~ district-level crime rate.  
32  
33  
34  
35  
36  
37

## 38 **METHODS**

### 39 **Study population**

40  
41  
42  
43 Data were obtained from the Seoul Welfare Panel Study (SWPS), which tracked a representative  
44  
45 sample of households residing in 25 administrative districts in Seoul, South Korea. The SWPS  
46  
47 was launched in 2008 by the Seoul Welfare Foundation. The 1<sup>st</sup> wave of the survey was  
48  
49 conducted in 2008 and its supplementary survey targeting the low-income households was  
50  
51 implemented in 2009. The SWPS was suspended after the 2nd wave of the survey was conducted  
52  
53 in 2010 September. The survey employed a two-stage stratified cluster sampling approach where  
54  
55  
56  
57  
58  
59  
60



1  
2  
3 a representative sample of census tracts for each district was first drawn, and then households  
4  
5 were randomly selected within those sampled census tracts at baseline. A household  
6  
7 representative answered household survey and all members of a household whose age is 15 or  
8  
9 older were interviewed. A total of 7,761 individuals completed the interviews in Wave 1. The  
10  
11 SWPS have been publicly released [<http://panel.welfare.seoul.kr>]. Because all respondents  
12  
13 answered on questionnaire items we used in this study, we were able to conduct our analyses  
14  
15 based on the entire sample participated in the first wave of SWPS without listwise deletion or  
16  
17 missing value imputation for handling missing data. The final sample used in the data analysis of  
18  
19 this research consists of 7,761 individuals from 3,665 households from 25 administrative districts  
20  
21 in Seoul. The number of households in each district was 146.6 on average, ranging from 108 to  
22  
23 198. This research received IRB exemption from Division of Research Affairs at the San Diego  
24  
25 State University.  
26  
27  
28  
29  
30  
31

32  
33 **Exposure: district-level perceived ~~neighborhood~~ safety**

34  
35 District-level perceived ~~Pereceived-neighborhood~~ safety was assessed through the household  
36  
37 survey using a question about how much a household representative agrees with the following  
38  
39 statement: ‘My current residential environment is unsafe’. Respondents answered in a five level  
40  
41 ordinal scale from “strongly agree” (coded as 1) to “strongly disagree” (coded as 5). The answer  
42  
43 was then dichotomized into “unsafe” (coded as 0) for the response, 1-2 and “safe” (coded as 1)  
44  
45 for the response, 3-5. The binary responses from household representatives were aggregated to  
46  
47 calculate an administrative district-level perceived neighborhood safety by taking a weighted  
48  
49 average of household-specific perceived safety within each district with the household size used  
50  
51  
52  
53  
54  
55  
56  
57  
58  
59  
60

1  
2  
3 as weight. Such aggregation results in that the district-level perceived neighborhood safety is  
4 essentially sample proportion of individuals who answered “safe” within each district.  
5  
6  
7

### 8 9 **Outcome: poor self-rated health**

10  
11  
12 Poor self-rated health was assessed through the individual interview using the question “How  
13 would you rate your overall health?” This question is on the ordinal level, ranging from “very  
14 good” (coded as 1) to “very poor” (coded as 5). The response was then dichotomized into “good  
15 health” (coded as 0) for response, 1-3 and “poor health” (coded as 1) for response, 4-5. Although  
16 self-rated health cannot assess multi-dimensional aspects of health conditions, it is known to be a  
17 reliable predictor of life-expectancy after adjusting for other health indicators.<sup>15</sup>  
18  
19  
20  
21  
22  
23  
24  
25  
26

### 27 **Covariates**

28  
29  
30 We included several confounders in the data analysis. For individual-level confounders, we have  
31 sex, age group (15-19-~~yrs~~, 20-29-~~yrs~~, 30-39-~~yrs~~, 40-49-~~yrs~~, 50-59-~~yrs~~, 60-69-~~yrs~~, and 70-~~years~~ or  
32 more), education level (elementary or less, junior high school, high school, college graduate,  
33 university graduate, and graduate school or more), marital status (married or cohabiting vs.  
34 others), and job status (employed vs. unemployed), household income with six categories  
35 (1,000,000 KRW or less; 1,010,000-2,000,000 KRW; 2,010,000-3,000,000 KRW; 3,010,000-  
36 4,000,000 KRW; 4,010,000-5,000,000 KRW; and Above 5,000,000 KRW), and individual-  
37 level-perception of district neighborhood-safety (unsafe vs. safe). Because neighborhood safety  
38 was assessed solely from the household survey, we assigned the value of perceived  
39 neighborhood safety measured from each household representative to all members of the  
40 household.  
41  
42  
43  
44  
45  
46  
47  
48  
49  
50  
51  
52  
53  
54  
55  
56  
57  
58  
59  
60

1  
2  
3 We considered district-level crime rate as a potential covariate at district-level because it can  
4 influence residents' health as well as perceived safety. District-level crime rates for each of 25  
5 administrative district ('Gu') in Seoul were collected from the 'Analytical report on crimes,  
6 (2008)' that is annually published by supreme prosecutors' office in South Korea.<sup>16</sup> District-level  
7 crime rate was calculated by dividing the total number of crimes by the total number of residents  
8 in each district (Expressed in number/year/1,000 persons). Using an administrative district  
9 identifier in the SWPS, we linked the official crime rate of each administrative district to our  
10 final dataset of the SWPS.  
11  
12  
13  
14  
15  
16  
17  
18  
19  
20  
21

## 22 Data analysis

23  
24 Mixed effect logistic regression was used to investigate the association between district-level  
25 safety and self-rated health. Because of the hierarchical structure in our data (i.e., individuals are  
26 nested in households, which in turn are nested in districts), within-household and within-district  
27 correlations were incorporated using household-specific and district-specific random intercepts.  
28 We made stepwise adjustments of potential confounders in the data analysis. First, we adjusted  
29 for potential confounders including sex, age, education level, job status, marital status, and  
30 household-level income. Second, we ~~additionally adjusted for~~ ~~district-level crime rate.~~  
31 ~~individual level perceived neighborhood safety to the previously listed confounders for~~  
32 ~~adjustment.~~ Finally, we examined the association after adjusting for individual perception of  
33 district safety~~individual level perceived neighborhood safety~~ ~~district level crime rate~~ in addition  
34 to all of the previously mentioned confounders. All of the confounders were included as  
35 categorical variables, and the district-level perceived safety was included after standardization  
36 for simple interpretation in the model. All computations were done using R statistical software.  
37  
38  
39  
40  
41  
42  
43  
44  
45  
46  
47  
48  
49  
50  
51  
52  
53  
54  
55  
56  
57  
58  
59  
60

## RESULTS

Table 1 presents the distribution of the study population and the prevalence of poor self-rated health by each of the individual-level, household-level, and district-level characteristics. Overall, poor self-rated health was reported at 20.9% (1,620 out of 7,761 participants). The proportion was higher for women and showed an increasing pattern with age. Lower proportions were observed for participants in lower education levels. The unemployed and people living in an unsafe neighborhood exhibited higher prevalence of poor self-rated health compared to the employed and those living in a safe neighborhood. Household income were fairly equally distributed in the SWPS. As to the district-level [perceived](#) safety and crime rate, given the overall mean of each variable, relative size of each standard deviation shows that there were considerable variations among the 25 districts.

District-level [perceived](#) safety was significantly associated with poor self-rated health while different sets of confounders being step-wisely adjusted (Table 2). Living in a district where its safety level is 1 standard deviation (0.08) higher resulted in 13% lower odds of reporting self-rated poor health status (OR: 0.87, 95% CI: 0.78, 0.97) after adjusting for sex, age, education level, job status, marital status, and household-level income. When [additionally](#) adjusted for [district-level crime rate, this association was slightly attenuated but still significant \(OR: 0.86, 95% CI: 0.77, 0.95\).](#) ~~individual level safety, this association was slightly attenuated but still significant (OR: 0.88, 95% CI: 0.79, 0.98).~~ When we ~~controlled adjusted for for individual perception of district safety~~ [district-level crime](#) in addition to previously mentioned potential

1  
2  
3 | [confounders](#), the magnitude of this association was ~~slightly increased and re~~ remained significant  
4  
5 (OR: 0.86, 95% CI: 0.77, 0.96).  
6  
7

## 10 DISCUSSION

11  
12 Evidence from our study indicated that district-level perceived safety, which was assessed by  
13 aggregating responses from residents in each district, was significantly associated with poor self-  
14 rated health even after controlling for demographic information, ~~and SES~~, [and district-level](#)  
15 [crime rate](#). Notably, this association was still robust when we additionally adjusted for ~~district-~~  
16 ~~level crime rate and~~ individual [reporting perception](#) of ~~perceived neighborhood~~ [district](#) safety.  
17  
18  
19  
20  
21  
22  
23  
24

25 Our findings are in line with previous research that showed associations between perceived  
26 neighborhood safety and health outcomes. Past studies have also reported that residents who  
27 perceived that their neighborhood had more severe problems were more likely to experience  
28 greater anxiety, stress, and depression.<sup>6,17</sup> The studies sampled women, children, and the elderly  
29 also provided consistent evidence of a relationship between perceived crime risk and physical  
30 health.<sup>7,14</sup>  
31  
32  
33  
34  
35  
36  
37  
38  
39

40 In this study, district-level crime rate was not associated with self-rated health in the fully  
41 adjusted model. Furthermore, our post-hoc analysis showed that there was no statistically  
42 significant relationship between district crime rate and residents' self-rated health regardless of  
43 [adjustment of confounder](#) ~~seovariate adjustment~~, although district-level crime rate could be a  
44 major influence on district-level safety. This finding is different from past studies that reported a  
45 significant relationship between district crime rate and residents' health such as coronary heart  
46 disease<sup>18</sup> and low birth weight.<sup>19</sup>  
47  
48  
49  
50  
51  
52  
53  
54  
55  
56  
57  
58  
59  
60

1  
2  
3 The differential association between district-level perceived safety and crime rate in relation to  
4 self-rated health could be explained by-in three ways. First, mass media may increase individual-  
5  
6  
7  
8 level perceived neighborhood insecurity regardless of their neighborhood crime rates, especially  
9  
10 when they reported the crime in ways of exaggeration.<sup>20,21</sup> The mass media tend to emphasize  
11  
12 criminal stories which can draw attention from audience.<sup>22</sup> Previous studies called this  
13  
14 phenomenon as "cultivation effect" meaning that exposure to the world of television cultivates  
15  
16 exaggerated perceptions of viewers and magnifies viewers' fear about crime.<sup>23</sup> The residents who  
17  
18 watched news ~~on~~ about neighborhood crimes are more likely to ~~may~~ perceive their neighborhood  
19  
20 more vulnerable regions to crime regardless of regional crime rate. Moreover, mass media may  
21  
22 also increase the individual level perceived neighborhood safety regardless of their objective  
23  
24 neighborhood crime rates.<sup>21</sup>  
25  
26  
27  
28  
29

30 Second, different types of crime would have different effects on the perceived risk or fear of  
31  
32 crime. For example, murder, rape, and personal theft may have higher effects on the fear of  
33  
34 crime than larceny and auto-theft. Hence, total crime rate that was used in this research might not  
35  
36 be sophisticated enough to clearly capture the association between the prevalence of crime in the  
37  
38 district and the residents' health condition.<sup>24</sup> However, when we conducted a post-hoc analysis  
39  
40 using a different measure, '5 index crime rate', which includes major five serious crimes (i.e.  
41  
42 murder, robbery, rape, assault and theft) that has been adopted by Korean police to indicate  
43  
44 violent crime rate, still we could not find any association with residents' self-rated health.  
45  
46  
47  
48  
49

50 Finally, if social and physical resources of neighborhood are deteriorated or deprived, residents  
51  
52 tend to perceive neighborhood safety more irrespective of the objective neighborhood crime  
53  
54 rate.<sup>25</sup> The poor quality of social and physical environment, such as dilapidated houses or having  
55  
56  
57  
58  
59  
60

1  
2  
3 no formal or informal neighborhood networks, may work as a trigger to make residents perceive  
4  
5 their neighborhood dangerous.<sup>26,27</sup>  
6  
7

8  
9 There could be several pathways linking district-level perceived neighborhood safety to  
10  
11 ~~resident's self-rated health irrespective of neighborhood crime rate and individual level~~  
12 ~~perceived neighborhood safety~~. First, higher district-level perceived safety can cause less  
13  
14 outdoor physical activities<sup>7,28</sup> leading to poor health. Second, elevated district-level perceived  
15  
16 safety ~~may iteratively~~ aggravates social supports or deteriorates physical environments, in turn, it  
17  
18 may harm mental and physical outcomes.<sup>29</sup> Last, elevated district-level perceived safety may be  
19  
20 a latent stressor causing chronic stress status that could undermine residents' mental health.<sup>30</sup>  
21  
22  
23  
24  
25

26 Our study has several limitations. First, potential reverse causation is of concern due to its cross-  
27  
28 sectional study design, implying that people with poor-self rated health are more likely to  
29  
30 perceive their neighborhood as unsafe. Future studies are required to examine the causal  
31  
32 association between district-level perceived safety and health outcomes. However, because the  
33 association was still significant after adjusting for individual perceived safety, which is a critical  
34 pathway of this reverse causation, so we believe that the potential reverse causation cannot fully  
35 explain the observed association. Second, this study assessed perceived neighborhood safety  
36  
37 through a single-item measure. This item may not reflect multi-dimensional aspects of the  
38  
39 neighborhood safety.  
40  
41  
42  
43  
44  
45  
46  
47  
48

49 Despite these limitations, our study has the strength in that we used representative samples for  
50  
51 each operationalized administrative district, which enabled multi-level analysis using ~~an~~ district-  
52  
53 level aggregate measure of perceived safety whereas most of the previous studies used individual  
54  
55 reporting of perceived safety as an exposure variable. Furthermore, to our knowledge, this is one  
56  
57  
58  
59  
60

1  
2  
3 of the first studies to examine the association between district-level perceived neighborhood  
4 safety and health outcome after adjusting for district-level crime rate.  
5  
6  
7

8  
9 In sum, our study showed that district-level perceived safety was associated with residents' poor  
10 self-rated health even after controlling for demographic influences, SES, and district-level crime  
11 rate, and individual-level perceived safety. Our study results evoke the importance of local  
12 authorities (or governments) to make efforts toward improving neighborhood perceived safety to  
13 enhance residents' health.  
14  
15  
16  
17  
18  
19  
20  
21  
22  
23  
24  
25  
26  
27  
28  
29  
30  
31  
32  
33  
34  
35  
36  
37  
38  
39  
40  
41  
42  
43  
44  
45  
46  
47  
48  
49  
50  
51  
52  
53  
54  
55  
56  
57  
58  
59  
60



Table 1. Descriptive statistics for the independent variables and their associations with self-rated poor health (N=7761)

| Variables                                                       | Total       | Prevalence of poor self-rated health |              |
|-----------------------------------------------------------------|-------------|--------------------------------------|--------------|
|                                                                 | N           | N (%)                                | p-values     |
| <i>Individual level variables (N=7,761)</i>                     |             |                                      |              |
| <b>Sex</b>                                                      |             |                                      | <0.0001      |
| Male                                                            | 3,547       | 599 (16.9)                           |              |
| Female                                                          | 4,214       | 1,021 (24.2)                         |              |
| <b>Age (years)</b>                                              |             |                                      | <0.0001      |
| 15-19                                                           | 536         | 17 (3.2)                             |              |
| 20-29                                                           | 973         | 26 (2.7)                             |              |
| 30-39                                                           | 1,577       | 92 (5.8)                             |              |
| 40-49                                                           | 1,425       | 185 (13.0)                           |              |
| 50-59                                                           | 1,139       | 242 (21.2)                           |              |
| 60-69                                                           | 1,130       | 482 (42.7)                           |              |
| 70 or more                                                      | 981         | 576 (58.7)                           |              |
| <b>Job Status</b>                                               |             |                                      | <0.0001      |
| Employed                                                        | 3,199       | 293 (9.2)                            |              |
| Unemployed                                                      | 4,562       | 1,327 (29.1)                         |              |
| <b>Education Level</b>                                          |             |                                      | <0.0001      |
| Elementary school or less                                       | 1,143       | 664 (58.1)                           |              |
| Middle school                                                   | 703         | 271 (38.5)                           |              |
| High school                                                     | 2,483       | 433 (17.4)                           |              |
| College graduate                                                | 572         | 46 (8.0)                             |              |
| University graduate                                             | 2,516       | 185 (7.4)                            |              |
| Graduate school or more                                         | 344         | 21 (6.1)                             |              |
| <b>Marital status</b>                                           |             |                                      | 0.151        |
| Married/cohabiting                                              | 5,059       | 1,031 (20.4)                         |              |
| Others                                                          | 2,702       | 589 (21.8)                           |              |
| <b>Individual-level safety</b>                                  |             |                                      | <0.0001      |
| Safe                                                            | 6,777       | 1,361 (20.1)                         |              |
| Unsafe                                                          | 984         | 259 (26.3)                           |              |
| <i>Household level variables (N=3,665)</i>                      |             |                                      |              |
| <b>Household Income</b>                                         |             |                                      |              |
| 1,000,000 KRW or less                                           | 770         |                                      |              |
| 1,010,000-2,000,000 KRW                                         | 772         |                                      |              |
| 2,010,000-3,000,000 KRW                                         | 656         |                                      |              |
| 3,010,000-4,000,000 KRW                                         | 510         |                                      |              |
| 4,010,000-5,000,000 KRW                                         | 345         |                                      |              |
| Above 5,000,000 KRW                                             | 612         |                                      |              |
| <i>District level variables (N=25)</i>                          |             |                                      |              |
|                                                                 | <u>Mean</u> | <u>S.D.</u>                          | <u>Range</u> |
| <b>District-level perceived safety</b> (mean (SD)) <sup>a</sup> | 0.87        | 0.08                                 | 0.68-0.98    |
| <b>District-level crime rate</b> (mean (SD)) <sup>b</sup>       | 4.63        | 2.94                                 | 2.25-16.31   |

1  
2  
3     <sup>a</sup> District-specific average of individual-level safety  
4

5     <sup>b</sup> Expressed in number/year/1,000 persons  
6  
7  
8  
9  
10  
11  
12  
13  
14  
15  
16  
17  
18  
19  
20  
21  
22  
23  
24  
25  
26  
27  
28  
29  
30  
31  
32  
33  
34  
35  
36  
37  
38  
39  
40  
41  
42  
43  
44  
45  
46  
47  
48  
49  
50  
51  
52  
53  
54  
55  
56  
57  
58  
59  
60

For peer review only

1  
2  
3  
4  
5  
6  
7  
8  
9  
10  
11  
12  
13  
14  
15  
16  
17  
18  
19  
20  
21  
22  
23  
24  
25  
26  
27  
28  
29  
30  
31  
32  
33  
34  
35  
36  
37  
38  
39  
40  
41  
42  
43  
44  
45  
46  
47  
48  
49

Table 2. Associations between district-level perceived safety and poor self-rated health

|                                                 | Unadjusted |              | Adjusted <sup>a</sup> |              |             |                     |             |                    |
|-------------------------------------------------|------------|--------------|-----------------------|--------------|-------------|---------------------|-------------|--------------------|
|                                                 | OR         | 95% CI       | OR                    | 95% CI       | OR          | 95% CI              | OR          | 95% CI             |
| District-level perceived safety <sup>b</sup>    | 0.83***    | (0.76, 0.91) | 0.87*                 | (0.78, 0.97) | 0.86**      | (0.77, 0.95)        | 0.86**      | (0.77, 0.96)       |
| <u>District-level crime rate</u>                |            |              |                       |              | <u>0.97</u> | <u>(0.93, 1.01)</u> | <u>0.97</u> | <u>(0.93,1.01)</u> |
| <u>Individual perception of district safety</u> |            |              |                       |              |             |                     | <u>0.82</u> | <u>(0.65,1.04)</u> |

<sup>a</sup> Adjusted for sex, age, education level, job status, marital status, and household-level income

<sup>b</sup> Aggregated responses about neighborhood safety among residents in the same district. The variables was included in the data analysis after standardization

\* p-value<0.05, \*\* p-value<0.01

1  
2  
3 Acknowledgments: None  
4  
5

6  
7  
8 Competing interests: None  
9

10  
11  
12 This research received no specific grant from any funding agency in the public, commercial or  
13 not-for-profit sectors.  
14  
15

16  
17  
18  
19  
20  
21  
22  
23  
24  
25  
26  
27  
28  
29  
30  
31  
32  
33  
34  
35  
36  
37  
38  
39  
40  
41  
42  
43  
44  
45  
46  
47  
48  
49  
50  
51  
52  
53  
54  
55  
56  
57  
58  
59  
60

For peer review only

## REFERENCES

1. Tseloni A, Mailley J, Farrell G, Tilley N. Exploring the international decline in crime rates. *European Journal of Criminology*. 2010;7(5):375-394.
2. McCall PL, Land KC, Parker KF. Heterogeneity in the rise and decline of city-level homicide rates, 1976–2005: A latent trajectory analysis. *Social Science Research*. 2011;40(1):363-378.
3. Sampson RJ, Raudenbush SW, Earls F. Neighborhoods and violent crime: A multilevel study of collective efficacy. *Science*. 1997;277(5328):918-924.
4. Patterson EB. Poverty, income inequality, and community crime rates. *Criminology*. 1991;29(4):755-776.
5. Krug EG, Mercy JA, Dahlberg LL, Zwi AB. The world report on violence and health. *The lancet*. 2002;360(9339):1083-1088.
6. Gary TL, Stark SA, LaVeist TA. Neighborhood characteristics and mental health among African Americans and whites living in a racially integrated urban community. *Health & Place*. 2007;13(2):569-575.
7. Tucker-Seeley RD, Subramanian S, Li Y, Sorensen G. Neighborhood safety, socioeconomic status, and physical activity in older adults. *American journal of preventive medicine*. 2009;37(3):207-213.
8. Green G, Gilbertson JM, Grimsley MF. Fear of crime and health in residential tower blocks A case study in Liverpool, UK. *The European Journal of Public Health*. 2002;12(1):10-15.
9. Latkin CA, Curry AD. Stressful neighborhoods and depression: a prospective study of the impact of neighborhood disorder. *Journal of health and social behavior*. 2003:34-44.
10. Ziersch AM, Baum FE, MacDougall C, Putland C. Neighbourhood life and social capital: the implications for health. *Social science & medicine*. 2005;60(1):71-86.
11. Raudenbush SW. *Hierarchical linear models: Applications and data analysis methods*. Vol 1: Sage; 2002.
12. Kruger DJ, Reischl TM, Gee GC. Neighborhood social conditions mediate the association between physical deterioration and mental health. *American journal of community psychology*. 2007;40(3-4):261-271.
13. Wen M, Hawkey LC, Cacioppo JT. Objective and perceived neighborhood environment, individual SES and psychosocial factors, and self-rated health: An analysis of older adults in Cook County, Illinois. *Social science & medicine*. 2006;63(10):2575-2590.
14. White M, Kasl SV, Zahner GE, Will JC. Perceived crime in the neighborhood and mental health of women and children. *Environment and Behavior*. 1987;19(5):588-613.
15. Idler EL, Benyamini Y. Self-rated health and mortality: a review of twenty-seven community studies. *J Health Soc Behav*. Mar 1997;38(1):21-37.
16. Supreme Prosecutors' Office Republic Of Korea. *Analytical Report on Crimes (2008)*. 2009.
17. Curry A, Latkin C, Davey-Rothwell M. Pathways to depression: The impact of neighborhood violent crime on inner-city residents in Baltimore, Maryland, USA. *Social Science & Medicine*. 2008;67(1):23-30.
18. Sundquist K, Theobald H, Yang M, Li X, Johansson S-E, Sundquist J. Neighborhood violent crime and unemployment increase the risk of coronary heart disease: a multilevel study in an urban setting. *Social science & medicine*. 2006;62(8):2061-2071.
19. O'Campo P, Xue X, Wang M-C, Caughy M. Neighborhood risk factors for low birthweight in Baltimore: a multilevel analysis. *American Journal of Public Health*. 1997;87(7):1113-1118.
20. Warr M. Fear of victimization. *Public Perspective*. 1993;5:25-28.
21. Romer D, Jamieson KH, Aday S. Television news and the cultivation of fear of crime. *Journal of communication*. 2003;53(1):88-104.

- 1
  - 2
  - 3
  - 4
  - 5
  - 6
  - 7
  - 8
  - 9
  - 10
  - 11
  - 12
  - 13
  - 14
  - 15
  - 16
  - 17
  - 18
  - 19
  - 20
  - 21
  - 22
  - 23
  - 24
  - 25
  - 26
  - 27
  - 28
  - 29
  - 30
  - 31
  - 32
  - 33
  - 34
  - 35
  - 36
  - 37
  - 38
  - 39
  - 40
  - 41
  - 42
  - 43
  - 44
  - 45
  - 46
  - 47
  - 48
  - 49
  - 50
  - 51
  - 52
  - 53
  - 54
  - 55
  - 56
  - 57
  - 58
  - 59
  - 60
22. Lipschultz JH, Hilt ML. *Crime and local television news: Dramatic, breaking, and live from the scene*. Routledge; 2002.
23. Gerbner G. Cultivation analysis: An overview. *Mass Communication and Society*. 1998;1(3-4):175-194.
24. Meier RF, Short JF. CRIME AS HAZARD: PERCEPTIONS OF RISK AND SERIOUSNESS\*. *Criminology*. 1985;23(3):389-400.
25. Carpiano RM. Toward a neighborhood resource-based theory of social capital for health: Can Bourdieu and sociology help? *Social science & medicine*. 2006;62(1):165-175.
26. Rodrigues CD. Civil democracy, perceived risk, and insecurity in Brazil: An extension of the systemic social control model. *The Annals of the American Academy of Political and Social Science*. 2006;605(1):242-263.
27. Gibson CL, Zhao J, Lovrich NP, Gaffney MJ. Social integration, individual perceptions of collective efficacy, and fear of crime in three cities. *Justice Quarterly*. 2002;19(3):537-564.
28. Roman CG, Chalfin A. Fear of walking outdoors: a multilevel ecologic analysis of crime and disorder. *American journal of preventive medicine*. 2008;34(4):306-312.
29. Kim S-S, Chung Y, Perry MJ, Kawachi I, Subramanian S. Association between interpersonal trust, reciprocity, and depression in South Korea: A prospective analysis. *PLoS one*. 2012;7(1):e30602.
30. Stockdale SE, Wells KB, Tang L, Belin TR, Zhang L, Sherbourne CD. The importance of social context: neighborhood stressors, stress-buffering mechanisms, and alcohol, drug, and mental health disorders. *Social Science & Medicine*. 2007;65(9):1867-1881.

**STROBE 2007 (v4) checklist of items to be included in reports of observational studies in epidemiology\***  
**Checklist for cohort, case-control, and cross-sectional studies (combined)**

| Section/Topic             | Item # | Recommendation                                                                                                                                                                                                                                                                                                                                                                                                                                                         | Reported on page # |
|---------------------------|--------|------------------------------------------------------------------------------------------------------------------------------------------------------------------------------------------------------------------------------------------------------------------------------------------------------------------------------------------------------------------------------------------------------------------------------------------------------------------------|--------------------|
| Title and abstract        | 1      | (a) Indicate the study’s design with a commonly used term in the title or the abstract                                                                                                                                                                                                                                                                                                                                                                                 | 3                  |
|                           |        | (b) Provide in the abstract an informative and balanced summary of what was done and what was found                                                                                                                                                                                                                                                                                                                                                                    | 3                  |
| <b>Introduction</b>       |        |                                                                                                                                                                                                                                                                                                                                                                                                                                                                        |                    |
| Background/rationale      | 2      | Explain the scientific background and rationale for the investigation being reported                                                                                                                                                                                                                                                                                                                                                                                   | 5-6                |
| Objectives                | 3      | State specific objectives, including any pre-specified hypotheses                                                                                                                                                                                                                                                                                                                                                                                                      | 6                  |
| <b>Methods</b>            |        |                                                                                                                                                                                                                                                                                                                                                                                                                                                                        |                    |
| Study design              | 4      | Present key elements of study design early in the paper                                                                                                                                                                                                                                                                                                                                                                                                                | 6-7                |
| Setting                   | 5      | Describe the setting, locations, and relevant dates, including periods of recruitment, exposure, follow-up, and data collection                                                                                                                                                                                                                                                                                                                                        | 6-7                |
| Participants              | 6      | (a) <i>Cohort study</i> —Give the eligibility criteria, and the sources and methods of selection of participants. Describe methods of follow-up<br><i>Case-control study</i> —Give the eligibility criteria, and the sources and methods of case ascertainment and control selection. Give the rationale for the choice of cases and controls<br><i>Cross-sectional study</i> —Give the eligibility criteria, and the sources and methods of selection of participants | 6-7                |
|                           |        | (b) <i>Cohort study</i> —For matched studies, give matching criteria and number of exposed and unexposed<br><i>Case-control study</i> —For matched studies, give matching criteria and the number of controls per case                                                                                                                                                                                                                                                 |                    |
| Variables                 | 7      | Clearly define all outcomes, exposures, predictors, potential confounders, and effect modifiers. Give diagnostic criteria, if applicable                                                                                                                                                                                                                                                                                                                               | 7-9                |
| Data sources/ measurement | 8*     | For each variable of interest, give sources of data and details of methods of assessment (measurement). Describe comparability of assessment methods if there is more than one group                                                                                                                                                                                                                                                                                   |                    |
| Bias                      | 9      | Describe any efforts to address potential sources of bias                                                                                                                                                                                                                                                                                                                                                                                                              | 7-9                |
| Study size                | 10     | Explain how the study size was arrived at                                                                                                                                                                                                                                                                                                                                                                                                                              | 7                  |
| Quantitative variables    | 11     | Explain how quantitative variables were handled in the analyses. If applicable, describe which groupings were chosen and why                                                                                                                                                                                                                                                                                                                                           | 7-9                |
| Statistical methods       | 12     | (a) Describe all statistical methods, including those used to control for confounding                                                                                                                                                                                                                                                                                                                                                                                  | 9                  |
|                           |        | (b) Describe any methods used to examine subgroups and interactions                                                                                                                                                                                                                                                                                                                                                                                                    | 9                  |
|                           |        | (c) Explain how missing data were addressed                                                                                                                                                                                                                                                                                                                                                                                                                            | 9                  |
|                           |        | (d) <i>Cohort study</i> —If applicable, explain how loss to follow-up was addressed<br><i>Case-control study</i> —If applicable, explain how matching of cases and controls was addressed                                                                                                                                                                                                                                                                              | 9                  |

|                          |     |                                                                                                                                                                                                                                                                                                                                                                                                               |       |
|--------------------------|-----|---------------------------------------------------------------------------------------------------------------------------------------------------------------------------------------------------------------------------------------------------------------------------------------------------------------------------------------------------------------------------------------------------------------|-------|
|                          |     | <i>Cross-sectional study</i> —If applicable, describe analytical methods taking account of sampling strategy                                                                                                                                                                                                                                                                                                  |       |
|                          |     | (e) Describe any sensitivity analyses                                                                                                                                                                                                                                                                                                                                                                         |       |
| <b>Results</b>           |     |                                                                                                                                                                                                                                                                                                                                                                                                               |       |
| Participants             | 13* | (a) Report numbers of individuals at each stage of study—eg numbers potentially eligible, examined for eligibility, confirmed eligible, included in the study, completing follow-up, and analysed<br>(b) Give reasons for non-participation at each stage<br>(c) Consider use of a flow diagram                                                                                                               | 10    |
| Descriptive data         | 14* | (a) Give characteristics of study participants (eg demographic, clinical, social) and information on exposures and potential confounders<br>(b) Indicate number of participants with missing data for each variable of interest<br>(c) <i>Cohort study</i> —Summarise follow-up time (eg, average and total amount)                                                                                           | 10    |
| Outcome data             | 15* | <i>Cohort study</i> —Report numbers of outcome events or summary measures over time<br><i>Case-control study</i> —Report numbers in each exposure category, or summary measures of exposure<br><i>Cross-sectional study</i> —Report numbers of outcome events or summary measures                                                                                                                             | 10    |
| Main results             | 16  | (a) Give unadjusted estimates and, if applicable, confounder-adjusted estimates and their precision (eg, 95% confidence interval). Make clear which confounders were adjusted for and why they were included<br>(b) Report category boundaries when continuous variables were categorized<br>(c) If relevant, consider translating estimates of relative risk into absolute risk for a meaningful time period | 10    |
| Other analyses           | 17  | Report other analyses done—eg analyses of subgroups and interactions, and sensitivity analyses                                                                                                                                                                                                                                                                                                                |       |
| <b>Discussion</b>        |     |                                                                                                                                                                                                                                                                                                                                                                                                               |       |
| Key results              | 18  | Summarise key results with reference to study objectives                                                                                                                                                                                                                                                                                                                                                      | 10-13 |
| Limitations              | 19  | Discuss limitations of the study, taking into account sources of potential bias or imprecision. Discuss both direction and magnitude of any potential bias                                                                                                                                                                                                                                                    | 13    |
| Interpretation           | 20  | Give a cautious overall interpretation of results considering objectives, limitations, multiplicity of analyses, results from similar studies, and other relevant evidence                                                                                                                                                                                                                                    | 13    |
| Generalisability         | 21  | Discuss the generalisability (external validity) of the study results                                                                                                                                                                                                                                                                                                                                         |       |
| <b>Other information</b> |     |                                                                                                                                                                                                                                                                                                                                                                                                               |       |
| Funding                  | 22  | Give the source of funding and the role of the funders for the present study and, if applicable, for the original study on which the present article is based                                                                                                                                                                                                                                                 | 17    |

\*Give information separately for cases and controls in case-control studies and, if applicable, for exposed and unexposed groups in cohort and cross-sectional studies.

**Note:** An Explanation and Elaboration article discusses each checklist item and gives methodological background and published examples of transparent reporting. The STROBE checklist is best used in conjunction with this article (freely available on the Web sites of PLoS Medicine at <http://www.plosmedicine.org/>, Annals of Internal Medicine at <http://www.annals.org/>, and Epidemiology at <http://www.epidem.com/>). Information on the STROBE Initiative is available at [www.strobe-statement.org](http://www.strobe-statement.org).
